# Supplementary material
Source: publisher figshare collection journal article supplement (https://sage.figshare.com/ndownloader/files/23770453)
Supplement: Supplementary file 1 [file 23770453]

## Sheet: Mutiny Source Location
cname	Narrative	ccode	edate	eyear	ecode	likely	mutiny	notes	sources	location1	location2	location3	location4	location5	location6	location7	location8	dwyercase	dwyerstate	foundcase	foundcasenote
Angola	Soldiers mutinied in Menongue city, demanding payment arrears, threatened to rob a bank, and raided Kuando Kubango Military Command.	540	1991-12-27	1992	AN1	1	1		1. South and Southern Africa in Brief; Angola UNITA says FAPLA troops on strike over unpaid salaries; mutiny reported. BBC Summary of World Broadcasts. January 10 1992. LN. 2. Angolan Soldiers rioted in protest against nonpayment of wage arrears. January 10 1992. Xinhua General News Service. LN	Menongue City, Angola								0	0	0
Benin	Soldiers mutinied at the Ouidah military base, demanding the replacement of Chief of Staff de Souza. The mutiny was resolved after undisclosed promises were relayed.	434	1972-01-28	1972	BE1	1	1		1. Decalo, Samuel. "Regionalism, Politics, and the Military in Dahomey." The Journal of Developing Areas. 7(April 1978): 449-478. 2. Ronen, Dov. "Political Dynamics in Benin." Center for International Affairs, Harvard Univiersty & Department of State. 1984. Available from: https://apps.dtic.mil/dtic/tr/fulltext/u2/a143026.pdf	Ouidah, Benin								1	1	0
Benin	Captain Pascal Tawes led an army mutiny, taking control of an army base at Natitingou. The mutiny was fueled by demands that fellow soldiers be released from detention related to a coup attempt earlier that year.	434	1992-08-03	1992	BE3	1	1		1. Army officer denies mutiny in Benin. Xinhua General News Service. August 5 1992. LN. 2. Country Reports on Human Rights Practices, Report Submitted to the Committee on Foreign Affairs, U.S. House of Representatives and Committee on Foreign Relations, U.S. Senate by the Department of State in Accordance with Sections 116(d) and 502B(b) of the Foreign Assistance Act of 1961, as Amended. Availabl…	Natitingou, Benin								1	1	0
Benin	Soldiers mutinied, demanding peacekeeping arrears from missions in Liberia and Guinea-Bissau.	434	2000-01-19	2000	BE2	1	1		1. Benin; President Kerkou Reveals coup plot. Africa News. January 20 2000. LN. 2. Benin's president says coup detat being planned. Agence France Presse. January 20 2000. LN. 3. Benin's president accuses ex-soldiers, opponents of coup plot. Associated Press International. January 20 2000. LN. 4. Press in Benin asks president to punish suspected coup plotters. Agence France Presse. January 21 2000…	unknown								1	1	0
Burkina Faso	A mutiny occurred in Po after the arrest of Captain Sankara. Mutineers demanding Sankara's release took control of the city, erecting roadblocks, cutting off communications, and taking control of key areas in the city.	439	1983-05-18	1983	BF9	1	1	Mutiny that escalated into a coup.	1. Upper Volta in disarray. The Globe and Mail (Canada). May 18 1983. LN. 2. Dwyer, Maggie. "Situating soldiers' demands: mutinies and protests in Burkina Faso." Third World Quarterly 38(1): 219-234.	Po, Burkina Faso								1	1	0
Burkina Faso	Several hundred soldiers stationed in Ouagadougou peacefully demanded housing allowances mutinied, leading to an order of payment from President Compaore.	439	1999-07-15	1999	BF1	1	1		1. Burkina Faso; Burkinabe soldiers demand payment of housing allowances. Africa News. July 15 1999. LN.2. Burkina Faso; Compaore orders payment of allowances to soldiers. Africa news. July 15 1999. LN. 3. West Africa; IRIN-WA Update of Events in West Africa. Africa News. July 15 1999. LN. 4. Burkina Faso; Soldiers reject part-payment of housing allowance. Africa News. July 20 1999. LN. 5. Soldie…	Ouagadougou, Burkina Faso								1	1	0
Burkina Faso	About 100 soldiers mutinied in Ouagadougou, demanding their service be extended by 5 years and that they be offered better pensions in light of the rising cost of living and high unemployment rates. The mutineers attempted to hold protests in a building in the capital and were prevented by security services.	439	2007-10-07	2007	BF3	1	1		1. Burkina Faso; soldiers in the streets. Africa News. October 10 2007. LN. 2. Army in Burkina Faso demands better pension, service extensions. Associated Press International. October 8 2007. LN	Ouagadougou, Burkina Faso								1	1	0
Burkina Faso	Angry soldiers mutinied, demanding backpay. The soldiers surrounded the presidential palace in Ouagadougou, firing in the air and engaging in looting throughout the city.	439	2011-03-31	2011	BF12	1	1		1. Burkina's Compaore to meet with soldiers amid angry protests. Agence France Presse. March 31 2011. LN. 2. President 'flees' guard mutiny. All Africa. April 2011. LN.	Ouagadougou, Burkina Faso								1	1	0
Burkina Faso	A mutiny began when presidential guard members in Ouagadougou demanded housing, food, subsidies, and unpaid benefits, and sacked the home of the General Chief of Staff, looting homes and shopping centers, and firing into the air. The mutiny spread to rank and file soldiers in Po, Tenkodogo, and Kaya. The mutiny coincided with public protests.	439	2011-04-15	2011	BF5	1	1		1. Burkina Faso: Compaore returns to cpital after soldier mutiny. Africa News. April 11 2011. LN. 2. Burkina Faso; President 'flees' guard mutiny. Africa News. April 15 2011. LN. 3. Burkina Faso; Compaoré removes government and replaces army chief. Africa News. April 16 2011. LN. 4. Burkina Faso; Ouagadougou under curfew but riots spread to south. Africa News. April 17 2011. LN. 5. Burkina Faso p…	Ouagadougou, Burkina Faso	Po, Burkina Faso	Tenkodogo, Burkina Faso	Kaya, Burkina Faso					1	1	0
Burkina Faso	Soldiers in Po mutinied, firing their weapons into the air and seizing government vehicles.	439	2011-05-14	2011	BF7	1	1		1. Burkina Faso; Angry soldiers in late night rampage. Africa News. May 15 2011. LN. 2. Angry Burkina soldiers in late-night rampage. Agence France Presse. May 15 2011. LN. 3. Gunfire reported at Burkina Faso barracks. The Associated Press. May 15 2011. LN. 4. Gunshots heard in southern Burkinabe town- French Radio. BBC Monitoring Africa. May 15 2011. LN.	Po, Burkina Faso								1	1	0
Burkina Faso	Soldiers in Dori, Kaya, Dedougou, Bobo Dioulasso, and Tenkodogo mutinied, making pay demands. Some mutineers engaged in fighting with loyalist troops and at least seven people were killed.	439	2011-05-29	2011	BF8	1	1		1. Burkina Faso; Presidential guard fire on mutineers. Africa News. June 3 2011. LN. 2. Three civilians wounded as Burkina soldiers riot. Agence France Presse. May 30 2011. LN. 3. Mutiny hits Burkina's second largest city. Agence France Presse. June 1 2011. LN. 4. Fresh looting in Burkina's second largest city. Agence France Presse. June 2 2011. LN. 5. Burkina Faso brings mutiny under control. Ag…	Bobo Dioulasso, Burkina Faso	Dori, Burkina Faso	Kaya, Burkina Faso	Tenkodogo, Burkina Faso	Dedougou, Burkina Faso				0	1	1	Fourth instance in Burkina Faso 2011, Dwyer found 3, we found 4
Burundi	Soldiers mutinied while on a peacekeeping mission in Somalia, arming themselves without permission and accusing officers of stealing their wages. The soldiers were demanding $6000 US (a figure that includes unpaid monthly salaries, daily food ration payments, and a deployment fee.)	516	2009-01-09	2009	BU2	1	1		1. Burundian soldiers in sit-in in Somalia over salaries. BBC Monitoring Africa. January 9 2009. LN. 2. Burundi peace troops 'mutinied.' BBC News. Februrary 5 2010. Google.	Unknown location in Somalia								0	0	0
Cameroon	Hundreds of soldiers in Yaounde mutinied, demanding pay owed from their service on a UN peacekeeping mission in CAR. The soldiers also aired grievances related to the dangerous conditions on the mission. The soldiers occupied the main road connecting the Defense Ministry to the National Assembly where they demanded negotiations over demands.	471	2015-09-09	2015	CA1	1	1		1. Cameroon soldiers strike for pay. The Associated Press. September 9 2015. LN.2 Cameroonian soldiers demonstrate over peacekeeping mission pay. Xinhua General News Service. September 9 2015. LN. 3. Cameroonian leader orders minister to engage talks with disgruntled soldiers. BBC Monitoring Africa. September 10 2015. LN. 4. Cameroon to pay soldiers protesting for payment. States News Service. Se…	Yaounde, Cameroon								0	1	0
Cameroon	At least 50 soldiers near Zigue blocked a highway, demanding that their unpaid salaries and promised leave be honored. They were convinced to return to their barracks and 30 were subsequently arrested.	471	2017-06-04	2017	CA2	1	1		1. Cameroon soldiers block route, demand unpaid wages. Iran Daily. June 4 2017. LN. 2. Cameroin soldiers arrested after demanding bonuses. Agence France Presse. June 6 2017. LN. 3. Cameroon arrests soldiers demanding bonuses. Iran Daily. June 6 2017. LN. 4. Cameroon arrests 30 soldiers over bonus protests. Malaysian Government News. June 7 2017. LN. 5. Cameroon tribunal rejects bail for Anglophon…	Zigue, Cameroon								0	1	0
Central African Republic	Mutinous troops of the Presidential Guard surrounded the presidential palace and a radio station in Bangui demanding, 8 months of backpay. Troops were given two months of backpay and bonuses and agreed to return to their barracks.	482	1993-05-15	1993	CR1	1	1	Though CR1 and CR9 are close in time period, they are two separate events: CR1 was resoved peacefully when soldiers of the RDOT were paid. Soldiers of the presidential guard mutinied in the CR9 mutiny	1. Troops ring presidential palace to demand back pay. Agence France Presse. May 15 1993. LN. 2. Presidential palace siege ends peacefully, soldiers win back pay. Agence France Presse. May 15 1993. LN. 3. Soldiers seize radio, surround palace demanding pay. The Associated Press. May 15 1993. LN. 4. Presidential guard seize radio, surround palace demanding pay. The Associated Press. May 15 1993. L…	Bangui, Central African Republic								1	1	0
Central African Republic	Soldiers of the operational territorial defense regiment and regular army soldiers mutinied in Bangui, firing shots in the air and demanding payment of overdue wages. The mutineers surrounded the presidential palace. Soldiers returned to their barracks when they were promised a similar payout to the mutiny four days prior.	482	1993-05-19	1993	CR9	1	1	Though CR1 and CR9 are close in time period, they are two separate events: CR1 was resoved peacefully when soldiers of the RDOT were paid. Soldiers of the presidential guard mutinied in the CR9 mutiny	1. Troops mutiny over wage arrears. Agence France Presse. May 19 1993. LN. 2. Soldiers fire shots, surround presidential palace. The Associated Press. May 19 1993. LN. 3. Mutiny troops win two months wage arrears. Agence France Presse. May 20 1993. LN.	Bangui, Central African Republic								1	1	0
Central African Republic	Hundreds of soldiers of the mixed special intervention force in Bangui mutinied, surrounding the radio station blocking roads, and demanding more than three months backpay. The mutineers engaged in fighting with troops of the presidential security guard and French army units stationed near the airport. Fighting and looting quickly escalated leaving several killed and more than 50 wounded. The mut…	482	1996-04-18	1996	CR2	1	1		1. Angry unpaid troops besiege radio. Agence France Presse. April 18 1996. LN. 2. Untitled. Joseph Benamsse. Associated Press International. April 18 1996. LN. 3. Troops mutiny, demand back pay in growing crisis. Associated Press International. April 18 1996. LN. 4. URGENT. Agence France Presse. April 19 1996. LN. 5. Several dead in clashes in Central African Republic. Agence France Presse. April…	Bangui, Central African Republic								1	1	0
Central African Republic	Hundreds of soldiers mutinied in Bangui, demanding that their weapons be returned and control of armories be returned to the regular army after a mutiny the prior month. The mutineers took a cabinet minister hostage, engaged in fighting with loyalist troops and French soldiers, and surrounded the presidential palace. Five days into the mutiny, large scale protests broke out, with civilians protes…	482	1996-05-18	1996	CR3	1	1		1. UN chief condemns military rebellion in Bangui. Agence France Presse. May 23 1996. LN. 2. Thousands protest French military in Bangui. Agence France Presse. May 23 1996. LN. 3. Two mutinous soldiers killed in clashes with French troops. Agence France Presse. May 23 1996. LN. 4. French fire on Bangui mutineers. The Guardian (London). May 23 1996. LN. 5. France tries to broker peace with Bangui …	Bangui, Central African Republic								1	1	0
Central African Republic	Troops, likely from the same unit as those that mutinied in May (RDOT forces), mutinied in the capital. Mutineers stole weapons, took hostages, and patrolled the streets, again protesting the nonpayment of wages and demanding pay increases. France again deployed troops, this time more than 1500 soldiers. Mutineers engaged in gun battles with loyalist and French troops, resulting in at least 7 dea…	482	1996-11-15	1996	CR4	1	1		1. French soldiers patrol capital of Central African Republic. Agence France Presse. November 16 1996. LN. 2. Soldiers, French patrol capital after mutiny scare EDS: AMS. Associated Press International. November 16 1996. LN. 3. Disgruntled soldiers steal weapons, panic capital. Associated Press International. November 16 1996. LN. 4. France intervenes in mutiny in Central African Republic. Xinhua…	Bangui, Central African Republic								1	1	0
Central African Republic	Soldiers in Bangui mutinied and clashed with responding peacekeepers near the presidential palace. The mutineers were protesting unfair treatment by peacekeepers operating in the region. Fighting resulted in at least 100 deaths, including civilians. After five days of fighting, mutineers agreed to a five-point peace deal including turning over weapons and international monitoring of the peacekeep…	482	1997-06-20	1997	CR6	1	1		1. Soldiers fire rockets mortars on peacekeepers. Associated Press International. June 20 1997. LN. 2. Urgent: Seven hurt as shell hits French embassy in Bangui. Agence France Presse. June 21 1997. LN. 3. French troops caught up in fighting in Central African Republic. Associated Press International. June 22 1997. LN. 4. News in Brief: French troops join fighting. The Observer. June 22 1997. LN. …	Bangui, Central African Republic								0	1	1
Central African Republic	Troops loyal to recently-fired General Francois Bozize mutinied in Bangui, protesting the attempted arrest of the general. The mutineers blocked roads and fired on loyalist troops attempting to arrest Bozize, leading to fighting between that resulted in at least 15 deaths. Libya sent troops to guard the president as he attempted to escape the fighting. The mutiny ended when General Bozize surrend…	482	2001-11-04	2001	CR7	1	1		1. Fighting in Bangui as General Bozize resists arrest. Agence France Presse. November 3 2001. LN. 2. Fighting in Abngui as ex-army head resists arrest. Agence France Presse. November 3 2001. LN. 3. Shooting breaks out in former Central African Republic capital. Associated Press International. November 3 2001. LN. 4. Stand-off after attempt to arrest C. African Republic general. Agence France Pre…	Bangui, Central African Republic								1	1	0
Chad	A mutiny broke out in Aozou among the National and Nomad Guard, FKA Territorial Guard. The soldiers were reportedly angry about southern domination and killed soldiers in the garrison Aozou.	483	1968-08-26	1968	CH7	1	1		1. Globalsecurity.org: Chad, Rebellion in Eastern and Northern Chad. 2. Fearon, James, David Laitin, and Kimuli Kasara. 2006. "Chad- Random Narratives." Available from: https://web.stanford.edu/group/ethnic/Random%20Narratives/ChadRN2.6.pdf	Aozou, Chad								0	1	1
Chad	A mutiny of the armed forces began in Mondou when troops commandeered vehicles and took officers hostage, demanding back pay. Later in Sahr, mutineers took over the airport and local government buildings, took hostages, and stole funds from the treasury. The mutineers were protesting the nonpayment of wages. The mutiny reportedly also spread to Doba and Koumra.	483	1981-09-09	1981	CH3	1	1		1. DES SOLDATS SE SONT MUTINÉS DANS LE SUD. Le Monde. September 9 1981. Le Monde archive. 2. Chadian rebels claim capture town near Sudan. The Associated Press. Septeber 7 1981. LN. 3. Libya encouraging mutinies, official says. The Associated Press. September 14 1981. LN. 4. Chad's leader seeks aid from Paris to stall Libya. The Globe and Mail. September 17 1981. LN. 5. Chad president says he now…	Sarh, Chad	Moundou, Chad	Doba, Chad	Koumra, Chad					0	1	1
Chad	Mutineers loyal to ousted president Habre took hostages and killed at least 49 loyalist troops, also robbing an army payroll office. They took over the garrison in Zoumri and held hostages there. The mutiny is attributed to a pay dispute.	483	1991-09-20	1991	CH9	1	1		1. Army mutineers kill at least 49 government troops. The Associated Press. September 25 1991. LN. 2. West and Central Africa in brief; Chad process of army reorganisation. BBC Summary of world broadcasts. September 23 1991. LN. 3. Chad Army mutiny. Financial times (london). September 26 1991. LN. 4. Mutinous Chadian troops kill 49, hold more hostages. The Globe and Mail (Canada). September 26 19…	Zoumri, Chad								1	1	0
Chad	At least 80 troops mutinied in N'djamena, engaging in fighting with loyalist forces. The mutineers surrounded TV and radio stations, set up roadblocks, and looted cars and trailers. The soldiers were protesting the suspension of salary payments aimed at weeding out phantom soldiers.	483	2004-05-17	2004	CH4	1	1		1. Chad; army mutiny quelled in N'djamena. Africa News. May 17 2004. LN. 2. Chadian troops stage short-lived mutiny in Ndjamena. Agence France Presse. May 17 2004. LN. 3. Troops loyal to Chadian president put down mutiny as/rn/elt. Associated Press International. May 17 2004. LN. 4. Chad; Chad: Government continues to negotiate with army mutineers. Africa News. May 18 2004. LN. 5. Small group of …	N'djamena, Chad								0	1	1
Chad	Chadian troops on a peacekeeping mission in Mali abandoned their posts in protest of their long length of deployment. The more than 150 mutineers demanded that their rotation be sped up and left their post in Tessalit for Gao.	483	2013-09-18	2013	CH6	1	1		1. Chadian troops abandon north Mali posts in protest. Reuters. September 18 2013. Google. 2. Chadian managing editor detained over item on mutiny - RFI. BBC World Media. October 16 2013. LN.	Tessalit, Chad								1	1	0
Comoros Islands	About 20 soldiers of the presidential guard fired in the air and took control of the radio station and a port in Mutsamudu. The mutineers were protesting the promotion of Commander Mohamed Abu Bakar and demanding promotions and recognition. The mutiny was put down by loyalist troops.	581	2001-08-27	2001	CO2	1	1		1. Coup attempted in Comoros Islands. Associated Press Online. August 27 2001. LN. 2. Soldiers attempt second coup this month on breakaway island in Comoros. Associated Press. August 27 2001. LN. 3. Troops foil another coup attempt on breakaway island in the Comoros. The Canadian Press. August 27 2001. LN.	Mutsamudu, Anjouan (Comoros Islands)								0	0	0
Congo Brazzaville	Members of the army kidnapped Major Mountsaka, their commander-in-chief, along with the head of the security police, and established a curfew. The spontaneous mutiny appeared to be in response to the dismissal of captain Ngouabi, a member of the Kouyou tribe. The mutinous soldiers, also members of the Kouyou tribe, took control of Brazzaville, set up regular patrols, and established a curfew. Lea…	484	1966-06-27	1966	CB6	1	1	Mutiny that escalated into a coup.	1. McGowan, Patrick. 2003. "African Military coups detat, 1956-2001: Frequency, Trends and distribution." Journal of Modern African Studies 41(3): 339-370. 2. Ismael, Tareq. 1971. "The People's Republic of China and Africa." The Journal of Modern African Studies 9(4): 507-539. 3. Lee, J.M. "Clan Loyalties and Socialist Doctrine in the People's Republic of Congo." Royal Institute of International …	Brazzaville, Congo								1	1	0
Congo Brazzaville	Soldiers loyal to ousted President Denis Sassou Nguesso surrounded army headquarters and demanded the dismissal of several army officers who were fired by the interim government. The mutinous soldiers, who were previously part of the presidential guard, rejected the newly appointed officers, and gave the prime minister a 10-day ultimatum to appoint new military leadership.	484	1992-01-15	1992	CB1	1	1		1. Congolese troops surround army HQ, state demands, withdraw. Agence France Presse. January 15 1992. LN. 2. Congolese troops surround army HQ, government rejects demands. Agence France Presse. January 15 1992. LN. 3. Soldiers in Congo demand new leaders. The Associated Press. January 15 1992. LN. 4. Soldiers surround army headquarters in Congo, demand new leaders. The Associated Press. January 1…	Brazzaville, Congo								1	1	0
Congo Brazzaville	Around 100 soldiers mutinied over their dissatisfaction with camp conditions and the irregular payment of salaries. These soldiers were former members of militias aligned with President Pascal Lissouba and had been integrated into the regular armed forces via the terms of the 1995 peace agreement. The mutiny ended when the military agreed to “regularize” the mutineers as official members of the m…	484	1996-02-14	1996	CB5	1	1		1. Army Mutiny. Keesing's Record of World Events (1996) 42(2), pg. 40938. 2. Africa Research Bulletin February 1997: 34(2). 3. Africa Research Bulletin May 1997: 34(5), pg. 22.	Brazzaville, Congo								1	1	0
Congo Brazzaville	Recently integrated soldiers mutinied, demanding the removal of the Loudima center commander, their transfer to special units within the army, and their immediate promotion to the rank of sergeant. The mutineers gained control of a power station and disrupted rail services.	484	1997-02-04	1997	CB4	1	1		1. Bazenguissa-Ganga, Rémy. 1999. "The spread of political violence in Congo-Brazzaville." African Affairs. 98(390): 37-54, pg. 20. 2. Africa Research Bulletin February 1997: 34(2). 3. Africa Research Bulletin May 1997: 34(5), pg. 22. 4. Dwyer, Maggie. 2015. "Tactical Communication: Mutiny as dialouge in West and Central Africa." Africa Spectrum 50(1): 5-23.	Loudima, Congo								1	1	0
Congo Brazzaville	Approximately 30 non-commissioned officers surrounded Congo's defense ministry after the removal of a bill from the parliamentary agenda about the reorganization of the army. The soldiers stopped traffic in the capital and fired into the air, demanding that parliament debate/consider the reorganization bill which would raise military retirement from 20 years to 25 years. The soldiers returned to …	484	1997-05-06	1997	CB3	1	1		1. Congo; Congolese military ends mutiny. Africa News. May 7 1997. LN. 2. The News in Brief. Christian Science Monitor. May 1 1997. LN. 3. Non-Comissioned officers surround Congo's defence ministry. Agence France Presse. May 5 1997. LN. 4. Congo; Congolese military ends mutiny. Africa News. May 6 1997. LN. 5. Non-Comissioned officers end siege of Congo's defence ministry. Agence France Presse. Ma…	Brazzaville, Congo								1	1	0
Congo Kinshasa	Congolese soldiers at the Thysville military base mutinied against Belgian commanders. The mutineers, members of the Force Publique (renamed the Congolese National Army after independence on June 30, 1960) refused to accept orders from Belgian officers, demanded promotions, higher pay, and the removal of officers. The mutiny spread to other bases leading thousands of Belgians to flee. Patrice Lum…	490	1960-07-05	1960	CK1	1	1	Dwyer has one event listed in 1960, we found 2	1. Belgian women and children flee as troops rebel in Congo capital. The New York Times. July 8 1960. PROQ. 2. Congo urges U.S. to send troops; plea is rejected. The Associated Press. July 12 1960. PROQ. 3. Some troops end mutiny. The New York Times. July 8 1960. PROQ. 4. Troops of Congo Army stage mutinies. The New York Times. July 7 1960. PROQ. 5. Terror ends in Congo City; white army officers …	Leopoldville, Republic of the Congo	Thysville, Republic of the Congo	Luluabourg, Republic of the Congo	Shinkolobwe, Republic of the Congo					1	1	0
Congo Kinshasa	Soldiers of the Congo army mutinied in response to rumors/reports that officers’ salaries had been increased up to ten times higher than the average salary of lower ranks. The mutineers arrested their commanding officer, two other officers, and sent 100 soldiers to Colonel Joseph Mobutu’s residence. Soldiers dispersed when military policy fired warning shots. The soldiers returned to their barrac…	490	1960-09-22	1960	CK2	1	1	Dwyer has one event listed in 1960, we found 2	1. Soldiers calmed in Leopoldville: Army leader enters camp without an escort. The New York Times. September 23 1960. PROQ. 2. Young, Crawford. Politics in Congo: Decolonization and Independence. Princeton University Press: London, 1965.	Leopoldville, Republic of the Congo								0	1	1	Second instance, Dwyer found 1 in 1960, we found 2
Congo Kinshasa	Katangan soldiers mutinied, firing at United Nations troops stationed in the area. Reports indicate that 2 mutineers were killed.	490	1961-07-18	1961	CK3	1	1		1. Troops clash in Katanga. The New York Times. July 19 1961. PROQ. 2. Young, Crawford. Politics in Congo: Decolonization and Independence. Princeton University Press: London, 1965.	Katanga province, Republic of the Congo.								1	1	0
Congo Kinshasa	Soldiers in Luluabourg missed pay day and a mutiny ensued. Soldiers, given the holiday off and reportedly upset that they had not been ordered to move against Katangan forces, put their Colonel under house arrest believing him to be pro Moise Tshombe. Soldiers then went house to house searching for a radio transmitter, convinced that Col. Ndjoko had withheld information.	490	1961-11-01	1961	CK4	1	1		1. Congolese army difficult to control: lack of strong command over troops threatens the authority of the central government. The New York Times. November 19 1961. PROQ. 2. Mutiny in Congo U.N. links Gizenga to troops revolt. The New York Times. November 16 1961. PROQ. 3. White residents stage strikes after assaults by mutinous troops. The New York Times. November 9 1961. PROQ.	Albertville, Democratic Republic of Congo	Kindu, Republic of Congo							0	1	1	Second instance, Dwyer found 1 in 1961, we found 2
Congo Kinshasa	Katangese gendarmes who had been integrated into the Congolese Army rebelled and seized Kisangani, claiming they had not been paid for three months. The soldiers, estimated to be around 800 strong, killed several high-ranking Congolese officers. Approximately 300 mercenaries were also involved, 60 of which sided with the central government and the remaining 240 siding with the Katangese forces.	490	1966-07-23	1966	CK6	1	1		1. Belgian consul ousted by Congo. The New York Times. July 31 1966. PROQ. 2. Congo detaining 10 mercenaries: Staff officers held in wake of mutiny by Katangans. The New York Times. July 28 1966. PROQ. 3. Congo negotiates with rebels who seized ciy. The New York Times. July 25 1966. PROQ. 4. Young, Crawford. Politics in Congo: Decolonization and Independence. Princeton University Press: London, 1…	Kisangani, Democratic Republic of the Congo								1	1	0
Congo Kinshasa	Discontented Katangese soldiers, with assistance from Belgian mercenaries led by Major Jean Schramme, (Schramme Commandos) took over the army camp in Bukavu. Interviews with Michel Andre, the last Belgian to leave Bukavu after the rebellion started, suggested that the Katangese soldiers rebelled in protest of being underpaid and because of their treatment by the regular army, which viewed them as…	490	1967-07-05	1967	CK9	1	1		1. 60 feared killed by Congo troops: 5 Europeans reported to be among the slain after recapture of Bukavu. The New York Times. July 9 1967. PROQ. 2. Haskin, Jeanne. The Tragic State of the Congo: From Decolonization to Dictatorship. New York: Algora Publishing, 2005.	Bukavu, Democratic Republic of the Congo	Kisangani, Democratic Republic of the Congo							1	1	0
Congo Kinshasa	Paratroopers from the 31st brigade mutinied in protest over non-payment by the government for several months. Soldiers looted and pillaged a supply depot at the airport before driving to downtown Kishasa where they looted and pillaged stores on the main street. They also seized control of the international airport for approximately two hours before it was retaken by government forces, and set fir…	490	1991-09-23	1991	CK34	1	1	This mutiny ended when a payout was arranged on 9/30/1991. The next mutiny (CK35) began on 10/22/1991.	1. Mutiny in Zaire - Riots in the capital. The Associated Press. September 23 1991. LN. 2. Zaire: Parachutists storm Kinshasa, block airport, fronteirs. IPS-Inter Press Service. September 23 1991. LN. 3. Fifteen dead in Kinshasa riots: AZAP Agency. Agence France Presse. September 24 1991. LN. 4. France, Belgium send in troops as 19 die in Zaire mutiny. Agence France Presse. September 24 1991. LN.…	Kinshasa, Zaire	Lumumbashi, Zaire							1	1	0
Congo Kinshasa	Soldiers mutinied in Lubumbashi in protest of the Mobutu Sese Seko’s firing of Etienne Tshisekedi from his post as prime minister. Soldiers looted and pillaged shops in Lubumbashi and the mutiny spread to at least four towns. In addition to the firing of Tshisekedi, soldiers were also protesting in response to the government’s non-payment of their salaries (drawing parallels to the September 23-2…	490	1991-10-22	1991	CK35	1	1		1. Riots reported in more cities; speculation on new prime minster. The Associated Press. October 22 1991. LN. 2. Zaire troop mutiny spreading. Calgary Herald. October 27 1991. LN.	Lumumbashi, Zaire	reports say the mutiny spread to at least 3 other towns but they are unnamed							1	1	0
Congo Kinshasa	Soldiers in the Kokolo army camp in Kinshasa mutinied in protest of their January payment of Zaire banknotes (newly printed five-million Zaire notes) which were severely devalued due to hyperinflation. Soldier’s wives claimed they were unable to buy food with the banknotes. Troops loyal to Mobutu, more well-equipped than the mutineers, responded violently to the mutinous soldiers. At least 1,000 …	490	1993-01-29	1993	CK24	1	1		1. Death toll mounts in Zaire as troops go on rampage; France and Belgium to evacuate their nationals after foreigners are killed. The Guardian. January 30 1993. LN. 2. French troops sent to Zaire. The Herald (Glasgow). January 30 1993. LN. 3. 45 dead in Zaire after soldiers riot over pay. The Ottowa Citizen. January 30 1993. LN. 4. More than 1,800 foreigners flee Zaire violence for Brazzaville. …	Kinshasa, Zaire								1	1	0
Congo Kinshasa	Soldiers from Mobutu’s Special Presidential Guard blocked the entrance to the National Assembly with tanks and trenches, refusing to leave until lawmakers mandated that bank notes, specifically the five-million Zaire note issued by Mobutu Sese Seko, were accepted as legal currency. Army chiefs also rejected the interim constitution. Troops left the People’s Palace after the US, France, and Belgiu…	490	1993-02-24	1993	CK13	1	1		1. Elite force in Zaire gun rampage. Press Association. February 23 1993. LN. 2. Soldiers surround national assembly, demand acceptance of bank notes. The Associated Press. February 24 1993. LN. 3. Troops rampage in Zaire U.S. Congressman urges sanctions. The Globe and Mail. February 24 1993. LN. 4. Zaire troops said to kill 20. The New York Times. February 24 1994. LN. 5. Soldiers besiege Zaire'…	Kinshasa, Zaire								0	1	1	Second instance, Dwyer found 1 in 1993, we found 2
Congo Kinshasa	Disgruntled soldiers in the Badiadingi military camp in western Kinshasa mutinied, staging a protest in response to unpaid wages. Eight soldiers were subsequently convicted of mutiny and sentenced to death on 27 September 1997. 42 additional soldiers were sentenced to life imprisonment.	490	1997-09-20	1997	CK26	1	1		1. Unpaid soldiers mutiny in Congolese port city. The Associated Press January 22 1998. LN. 2. Unpaid soldiers mutiny in Congo. The Guardian. January 23 1998. LN.									0	1	1
Congo Kinshasa	Army troops clashed in barracks in Western Kinshasa when a group of soldiers in two jeeps pulled up and began firing in the air next to the Hotel Intercontinental, leading to 11 casualties. Later (that same day or into 29 November) army units clashed near the presidential palace with 18 soldiers being killed. The soldiers were reportedly protesting the arrest of General Anselme Masasu Mindanga. I…	490	1997-11-28	1997	CK25	1	1		1. Unpaid soldiers mutiny in Congolese port city. The Associated Press January 22 1998. LN. 2. Congolese general arrested, aide says. Associated Press International. November 25 1997. LN. 3. 18 reported dead as soldiers battle in capital of Congo. The Associated Press. November 29 1997. Google. 4. Congolese army units clash; 18 reported kiled. Associated Press. November 30 1997. Google. 5. Rebel …	Kinshasa, DRC								0	1	1
Congo Kinshasa	Soldiers in the port city of Matadi engaged in gunfire after mutinous soldiers fired into the air. The mutiny was brought on when a military commander attempted to get a car through customs without paying taxes, prompting soldiers loyal to the commander to open gunfire. Two civilians and one soldier were reportedly killed. The underlying cause of the mutiny; however, was said to be unrest due to …	490	1998-01-21	1998	CK17	1	1		1. Gunfire erupts in DRCongo port city. Agence France Presse. January 22 1998. LN. 2. Unpaid soldiers mutiny in Congolese port city. The Associated Press. January 22 1998. LN. 3. Official: Congolese battle sparked by customs dispute. The Associated Press. January 23 1998. LN. 4. Unpaid soldiers mutiny in Congo. The Guardian. January 23 1998. LN. 5. Soldiers mutiny. The Independent. January 23 199…	Matadi, DRC								0	1	1
Congo Kinshasa	Congolese army soldiers fired shots into the air and at a UN base in dispute over backpay. The soldiers had not been paid for approximately five to six months and were protesting their new redeployment orders as part of the UN Mission to combat the FDLR. A UN peacekeeper claimed that army commanders are not handing out the soldiers’ salaries. 27 soldiers were arrested for firing their weapons at …	490	2009-06-16	2009	CK19	1	1		1. DRCongo soldiers fire shots at UN base over no pay. Agence France Presse. June 17 2009. LN. 2. Congo troops fire on UN. Voice of America News. June 17 2009. LN. 3. DRCongo army soldiers in east mutiny over unpaid wages; refuse deployment. BBC Monitoring Africa. June 18 2009. LN. 4. Congo troops fier at UN base in pay dispute. Right Vision News. June 19 2009. LN.	Pinga (North Kivu), DRC								0	1	1
Congo Kinshasa	Approximately 50 soldiers of the Congolese army (FARDC) mutinied over pay in the Uvira territory where they were stationed as part of an operation to oust the FDLR. The soldiers were demanding four months’ worth of salary arrears. They blocked roads and fired into the air, inhibiting any civilian movement. Military authorities were reportedly able to convince the mutinous soldiers to remove block…	490	2009-08-28	2009	CK29	1	1		1. Congo-Kinshasa; Mutinous soldiers add to civilian fear in East. Africa News. August 28 2009. LN.	Uvira (South Kivu), DRC								0	1	1
Congo Kinshasa	Soldiers at the Marabo base in the Ituri district stormed the streets and fired into the air for several hours. The soldiers announced that they were mutinying in protest of their tough living conditions and against corruption within the national army. Some of the mutineers had been in the operational zone between six and eight years.	490	2012-02-15	2012	CK20	1	1		1. DRCongo army chief says mutiny among troops in northeast checked. BBC Monitoring Africa. February 21 2012. LN.	Ituri (Orientale), DRC								0	1	1
Eritrea	About 200 troops mutinied in Asmara, taking control of the Information Ministry and state-run TV. The mutineers forced employees to announce their demands which included the release of all political prisoners and the implementation of a constitution. Loyalist troops quelled the rebellion.	531	2013-01-21	2013	ER1	1	1		1. Eritrea's president breaks silence over army mutiny incident. Sudan Tribune. February 10 2013. Google. 2. Coup attempt by rebel soldiers said to fail in Eritrea. St. Paul Pioneer Press. January 20 2013. LN. 3. Eritrea; Rumors of military coup in Eritrea. Africa News. January 21 2013. LN. 4. Eritrea; Tanks roll against apparent coup. Africa News. January 21 2013. LN. 5. Eritrea; Eritrean mutine…	Asmara, Eritrea								0	0	0
Ethiopia	Troops mutinied in Asmara, demanding the cabinet resign, pay increases and social and political reforms, and taking envoys into custody. The mutineers captured a radio station and broadcast their demands and continued to express loyalty to the Emperor. The mutiny ended after the Emperor promised pay raises and social and political reforms.	530	1974-02-27	1974	ET1	1	1		1. Cabinet quits in Ethiopia as troop mutiny spreads. The New York Times. February 28 1974. PROQ. 2. Dissident Ethiopia troops seize Asmara. The New York Times. February 27 1974. PROQ. 3. Five dead in clashes in Ethiopia over high prices and idleness. The New York Times. February 23 1974. PROQ. 4. Ethiopian mutiny said to continue. New York Times. March 13 1974. Available from: https://www.nytime…	Asmara, Ethiopia	Addis Ababa, Ethiopia							0	0	0
Ethiopia	Ethiopian troops mutinied in Asmara and Debre Zeit (now Bishoftu), cutting off the city from outside communication, closing the airport, and blocking roads. The mutineers broadcast six demands on the radio including arrest and trials for high-ranking civilian and military personnel suspected of corruption. The mutiny ended after 3 days when Emperor Selassie promised social and political reforms.	530	1974-03-27	1974	ET2	1	1		1. Rebels in Ethiopia seize Asmara for second time. The New York Times. March 28 1974. PROQ. 2. Ethiopian rebels end occupation of city. The New York Times. March 29 1974. PROQ. 3. Ethiopian forces threaten action against government. The New York Times. March 27 1974. PROQ.	Asmara, Ethiopia	Debre Zeit, Ethiopia							0	0	0
Ethiopia	Third division troops in Harar mutinied, taking over a radio station and demanding the dismissal of the army chief of staff. The concerns over the chief of staff may have stemmed from corruption, with a mutineer statement reading, "it is our duty as members of the armed forces to see to it that the criminals in power are brought to justice."	530	1974-04-07	1974	ET3	1	1		1. Ethiopian troops in a new uprising. The New York Times. April 8 1974. PROQ. 2. Ethiopian Soldiers in a New Uprising Over food prices. The New York Times. April 13 1974. PROQ.	Harar, Ethiopia								0	0	0
Ethiopia	Troops of the mechanized brigade of the Third Divison in Jijiga mutinied, demanding an end to grain hoarding, high food prices, and profiteering. They further demanded that courts act more speedily to prosecute grain dealers.	530	1974-04-12	1974	ET4	1	1		1. Ethiopian premier orders former officials detained. The New York Times. April 19 1974. PROQ. 2. World News Brief: Troops end revolt in Ethiopia town. The New York Times. April 14 1974. PROQ. 3. Ethiopian soldiers in a new uprising over food prices. The New York Times. April 13 1974. PROQ.	Jijiga, Ethiopia								0	0	0
Ethiopia	Ethiopian army units mutinied in Addis Ababa, taking some ministers of the former government hostage and demanding that all former minsters be arrested. The mutiny ended when the commander promised that all minsters would be arrested. The grievances prompting the arrests centered on corruption of the prior regime.	530	1974-04-26	1974	ET5	1	1		1. Three top generals in Ethiopia reported arrested by army. The New York Times. April 29 1974. PROQ. 2. Ethiopian units mutiny in capital. The New York Times. April 27 1974. Google. Available from: https://www.nytimes.com/1974/04/27/archives/ethiopian-units-mutiny-in-capital-cabinet-meeting-spurs-talk-of.html	Addis Ababa, Ethiopia								0	0	0
Ethiopia	Troops mutinied in Addis Ababa, forcing radio employees to read statements denouncing cabinet ministers, army officers, and other officials taken hostage by the mutineers. Their grievances stemmed from the slow pace of reform and the refusal to try ministers the soldiers believed to be corrupt. Soldiers took control of key points of the city and the mutiny spread to Asmara. The mutiny ended when …	530	1974-06-28	1974	ET6	1	1		1. Ethiopian troops reported holding parts of the capital. The New York Times. June 29 1974. PROQ. 2. Ethiopia troops seize key centers in the capital. The New York Times. June 30 1974. PROQ. 3. Ethiopian military seizes aides of previous cabinet. July 1 1974. PROQ. 4. Army in Ethiopia tightens its grip. The New York Times. July 2 1974. PROQ. 5. Ethiopia's armed forces isolating Haile Selassie. T…	Addis Ababa, Ethiopia	Asmara, Ethiopia							0	0	0
Ethiopia	More than 100 soldiers mutinied in Fetche, blocking a major highway, seizing vehicles, and demanding to be paid their peacekeeping allowances from a mission in Liberia. The soldiers removed the roadblocks after a discussion with officials.	530	2005-07-03	2005	ET9	1	1		1. Ethiopian peacekeepers stage six-demo to demand pay. Agence France Presse. July 3 2005. LN. 2. Ethiopia soldiers block cars in pay dispute. AP Worldstream. July 3 2005. LN. 3. Ethiopia's U.N. Peacekeepers block road in pay dispute. US Fed News. July 3 2005. LN. 4. Ethiopian highway reopens after briefly blockaded by soldiers. Xinhua General News Services. July 3 2005. LN. 5. Ethiopian governme…	Fetche (Fiche), Ethiopia								0	0	0
Ethiopia	Hundreds of protesting elite soldiers, some armed, mutinied, marching to the national palace in Addis Ababa to demand a pay raise. There they confronted the PM (Abiy Ahmed) and made demands. The mutiny was deescalated when the PM ordered the mutineers to engage in training drills with him. 66 officers were punished for the "illegal march."	530	2018-10-11	2018	ET10	1	1		1. Ethiopia - Addis Ababa incident raises questions over army loyalty. AllAfrica.com. October 11 2018. Google. 2. Armed soldiers on our streets conjures painful memories [column]. Addis Fortune. October 20 2018. LN. 3. Abiy Ahmed: protesting Ethiopian soldiers wanted to kill me. BBC News. October 18 2018. Google. 4. Ethiopia: Member of army marched to PM office penalized. AllAfrica.com. December …	Addis Ababa, Ethiopia								0	0	0
Gambia	About 60 Gambian soldiers that served in an ECOMOG peacekeeping mission in Liberia mutinied in Banjul, protesting in front of the state house over unpaid deployment allowances. They demanded payment and the dismissal of army commander Colonel Ndaw Njie and the reinstatement of Major Sheikh Omay Fye.	420	1991-06-14	1991	GM2	1	1		1. Dwyer, Maggie. 2017. "Fragmented forces: The development of the Gambian military." African Security Review 26(4): 362-377. 2. World in brief: Dismissal demanded. The Globe and Mail. June 15 1991. LN.	Banjul, Gambia								1	1	0
Gambia	Soldiers from the Yundum barracks mutinied, abandoning their barracks and protesting to authorities in the capital. The soldiers were demanding pay from their participation in an ECOMOG mission in Liberia.	420	1992-02-03	1992	GM3	1	1		1. Dwyer, Maggie. 2017. "Fragmented forces: The development of the Gambian military." African Security Review 26(4): 362-377. 2. Dwyer, Maggie. "Anticipating the revolt: Trends in military mutinies in west and central Africa, 1960-2012." Available from: https://pdfs.semanticscholar.org/a02b/72508c0f7e14278128ac371fc2b12764d764.pdf 3. Dwyer, Maggie. 2017. Soldiers in Revolt: Army Mutinies in Afric…	Banjul, Gambia								1	1	0
Ghana	About 100 soldiers of the 3rd battalion of the Ghana regiment of infantry mutinied while serving in the UN peacekeeping operation in Tshikapa, Congo. The troops looted, damaged military property, and wounded their commanding officer. The unit was subsequently disbanded and 3 soldiers were sentenced to death. These sentences were later commuted to life in prison.	452	1961-01-18	1961	GH2	1	1		1. Ghana dooms mutineer. New York Times. March 11 1961. PROQ. 2. R. Simmonds. 1968. Legal problems arising from the United Nations military operations in the Congo. The Hague: Martinus Nijihoff.	Tshikapa, Zaire								1	1	0
Ghana	Seven soldiers were court-martialed in April for events "related to mutiny" and arrested on March 29 1980. The precise actions and motivations are unclear.	452	1980-03-29	1980	GH1	0	1	This event is marked as low confidence due to the lack of information on motives and actions involved in this event.	1. No Title. The Associated Press. April 24 1980. LN. 2. Disturbance in Ghana. The Washington Post. April 8 1980. LN. 3. Ghanian people urged to work towards stability. Xinhua General News Service. April 9 1980. LN. 4. West Africa: In Brief: Court Martial of seven soldiers and a civilian in Ghana. BBC Summary of World Broadcasts. 25 April 1980. LN. 5. West Africa: In Brief; Ghanaian paper on "som…	Gwollu, Ghana								0	1	1
Guinea	About 2000 soldiers mutinied in Conakry, killing at least 50 and wounding 100 more. The mutineers looted shops, fired in the air, shelled the presidential palace, blocked roads, and demanded the firing of Defense Minister Abdourahmane Diallo, accused of blocking pay raises and promotions. The troops demanded salary increases and submitted a 5-point demand statement also related to amnesty for the…	438	1996-02-02	1996	GU1	1	1	Mutiny that escalated into a coup.	1. Guinea army rebellion leaves 50 dead. Africa News. February 12 1996. LN. 2. Soldiers fire shots in Guinean capital. February 2 1996. LN. 3. Soldiers fire in protest over back pay. The Associated Press. February 2 1996. LN. 4. Calm returns after Guinean president strikes deal with rebels. Agence France Presse. February 3 1996. LN. 5. Rebels launch new artillery attach on presidential palace. Ag…	Conakry, Guinea								1	1	0
Guinea	Troops across Guinea, in Conakry, Kindia, Labé, Gueckedou, Macenta, Kankan, Nzerekore, and Faranah mutinied, demanding salary increases and the payment of wage arrears. The demands date back to an agreement created to end a 1996 mutiny. The soldiers rioted, fired in the air, blocked roads, and killed at least 2, injuring dozens more.	438	2007-05-02	2007	GU2	1	1		1. Guinean soldiers demand salary incremen. BBC Monitoring Africa. May 3 2007. LN. 2. VOA News: Guinean soldier fire shots over pay disputes. US Fed News. May 3 2007. LN. 3. Guinea; high-level meeting to end military protest. Africa News. May 4 2007. LN. 4. Guinean PM holds talks with military after deadly army riots. Agence France Presse. May 4 2007. LN. 5. Two killed as Guinea army riot over pa…	Conakry, Guinea	Kindia, Guinea	Labe, Guinea	Kankan, Guinea	Faranah (Faran), Guinea	Macenta, Guinea	Nzerekore, Guinea	Gueckedou, Guinea	1	1	0
Guinea	Parachute commandos and special forces mutinied in Conakry, holding their chief of staff hostage, blocking roads, and rioting. The mutineers demanded unpaid salaries dating back 12 years (totaling more than $1700 US) and expressed further anger at the firing of PM Kouyate. Later in the day, the mutiny spread to Conakry and Kindia, where soldiers also expressed anger over the PMs sacking. Mutineer…	438	2008-05-26	2008	GU4	1	1		1. Guinea soldiers seize chief to demand pay. Agence France Presse. May 26 2008. LN. 2. Crack Guinea troops protest over unpaid bonuses. Agence France Presse. May 26 2008. LN. 3. Soldiers In Guinea protest prime minster's firing. The Assoicated Press. May 25 2008. LN. 4. Guinean president said chairing meeting over soldier riots. BBC Monitoring Africa. May 26 2008. LN. 5. Witness: Guinea soldiers…	Conakry, Guinea	Kindia, Guinea							1	1	0
Guinea	Soldiers at the Kánkàn and Kindia army bases mutinied, demanding more pay. In total, 40 soldiers were dismissed in the aftermath of the mutiny for misconduct.	438	2009-06-17	2009	GU6	1	1		1. Guinea dismisses scores of protesting soldiers. Defence Web. June 17 2009. LN. 2. Guinea dismisses protesting soldiers. June 17 2009. The Daily Nation. Google. Available from: https://www.nation.co.ke/news/africa/1066-611956-6te9trz/index.html	Kánkàn, Guinea	Kindia, Guinea							1	1	0
Guinea	A mutiny broke out at Kayela camp in Forecariah prefecture when soldiers rebelled over their dismissal on medical grounds. The mutineers seized the commander of the camp before loyalist soldiers were able to establish order.	438	2010-03-31	2010	GU7	1	1		1. (CORR) Guinea arrests senior officer over mutiny in southwestern camp. BBC Monitoring Africa. April 10 2010. LN. 2. Ex-Junta chief's allies held. April 3 2010. News 24 Archives. Google. Available from: https://www.news24.com/Africa/News/Ex-junta-chiefs-allies-held-20100403 3. Mutiny in Guinea as Dadis Camara's Nephew is arrested. April 3 2010. Newstime Africa. Google. Available from: http://ww…	Forecariah, Guinea								1	1	0
Guinea	Mutineers in Conakry held the army paymaster hostage over grievances related to unpaid wages. The mutineers rioted and fired into the air.	438	2009-10-26	2009	GU10	1	1		1. Guinea soldiers hold paymaster in mutiny. Voice of America. October 27 2009. Google. Available from: https://www.voanews.com/archive/guinea-soldiers-hold-paymaster-mutiny. 2. Guinea Prime Minister Announces deal with mutinous soldier. Voice of America. October 27 2009. Google. Available from: https://www.voanews.com/archive/guinea-prime-minister-announces-deal-mutinous-soldiers. 3. Guinean pre…	Conakry, Guinea								0	1	1	Second instance, Dwyer found 1 in 2009, we found 2
Guinea-Bissau	A mutiny began when the head of an elite security unit, Major Robalo Gomes de Pina, was assassinated in Bissau. Troops engaged in fighting with loyalist forces and were put down, with more than 30 soldiers arrested. The mutiny reportedly stemmed from grievances related to pay and living conditions.	404	1993-03-17	1993	GB1	1	1		1. Guinea-Bissau terms military uprising as coup attempt. Xinhua General News Service. March 24 1993. LN. 2. Uprising servicemen arrested in Guinea-Bissau. The Xinhua General Overseas News ServiceXinhua General News Service. March 23 1993. LN. 3. McGowan, Patrick. 2003. "African Military coups detat, 1956-2001: Frequency, Trends and distribution." Journal of Modern African Studies 41(3): 339-370.…	Bissau, Guinea-Bissau								0	1	1
Guinea-Bissau	Mutinies broke out at two barracks in the capital, with soldiers taking over arms caches, after they were scheduled to be dismissed for alleged involvement in arms trafficking to Casamance rebels. More than 60 mutineers were killed in the governments response to the mutiny.	404	1998-06-08	1998	GB7	1	1		1. Guinea-Bissau; No reaction on Guinea Bissau mutiny at OAU Summit. Africa News. June 8 1998. LN. 2. Guinea-Bissau government troops storm renegade soldiers. Agence France Presse. June 9 1998. LN. 3. Gunfire subsides but leaves Guinea Bissau's capital in turmoil. Agence France Presse. June 11 1998. LN. 4. Guinea-Bissau; Libya mediates in Guinea-Bissau mutiny. Africa News. June 15 1998. LN. 5. Mu…	Bissau, Guinea-Bissau								0	1	1
Guinea-Bissau	A battalion of 600 soldiers mutinied at their barracks in Santa Luiza, blocking access to roads, barracks, and schools. The mutineers demanded 17 months of salary arrears and ended the mutiny when General Mane promised to have the issue promptly resolved.	404	1999-11-03	1999	GB2	1	1		1. Guinea-Bissau mutineers win promise of back pay. Agence France Presse. November 3 1999. LN. 2. Army protest in Guinea-Bissau causes unease ahead of elections. Associated Press International. November 4 1999. LN.	Santa Luiza, Guinea-Bissau								0	1	1
Guinea-Bissau	Mutineers blocked roads in the capital and warned civilians to stay home as they protested a delay in salary payments. The mutiny was short lived and soldiers were given their backpay.	404	1999-12-07	1999	GB3	1	1		1. West Africa; IRIN-WA Update of events in West Africa. Africa News. December 9 1999. LN. 2. Soldiers receive advances on war allowances. BBC Summary of world broadcasts. December 11 1999. LN. 3. Guinea-Bissau; situation returns to normal in Bissau. Africa News. December 8 1999. LN.	Bissau, Guinea-Bissau								0	1	1
Guinea-Bissau	More than 600 mutineers protested on the streets of Bissau, demanding payment for their participation in a peacekeeping mission in Liberia. During the course of the mutiny the army chief of staff and a colonel were killed. The soldiers then surrounded strategic buildings, including army HQ and engaged in gun battles with loyalist troops.	404	2004-10-06	2004	GB8	1	1		1. 2nd roundup: Guniea government negotiates with protesting soldiers. Deutsche Presse-Agentur. October 6 2004. LN. 2. 3rd roundup: unpaid soldiers mutiny in Guinea-Bissau, kill two officers Eds: Reledes with death of army chief of staff. Deutsche Presse-Agentur. October 6 2004. LN. 3. Political forces behind army mutiny in Guinea-Bissau: PM. Xinhua General News Service. October 6 2004. LN. 4. Ar…	Bissau, Guinea-Bissau								1	1	0
Guinea-Bissau	Soldiers fired at the residence of the president and attempted to capture an arms depot in Bissau. The mutineers were repelled by loyalist forces but the cause remains unclear. The events took place a week after parliamentary elections.	404	2008-11-23	2008	GB4	1	1		1. Mutiny in Guinea Bissau thwarted. The National. November 24 2008. Google. 2. Guinea Bissay president tells AU mutiny failed. Agence France Presse. November 23 2008. LN.	Bissau, Guinea-Bissau								0	1	1
Guinea-Bissau	Soldiers demanding better pay mutinied in Bissau, fanning out across the capital and attacking the headquarters of the armed forces.	404	2011-12-26	2011	GB5	1	1		1. Soldiers attack Bissau army HQ over pay. Agence France Presse. December 26 2011. LN. 2. Army chief: Bissau soldiers attack HQ over pay. December 26 2011. Morocco Today. Google. Available from: https://www.almaghribtoday.net/en/42/army-chief-bissau-soldiers-attack-hq-over-pay 3. Guinea-Bissau foils military coup, official says. December 26 2011. France 24. Google. Available from: https://www.fr…	Bissau, Guinea-Bissau								1	1	0
Ivory Coast	Hundreds of soldiers surrounded the presidential palace and some radio and television stations in Abidjan, protesting wages and living conditions. The mutiny ended when President Houphouet-Boigny agreed to meet with a delegation to discuss demands.	437	1990-05-14	1990	IC1	1	1		1. Cocoa soars to contract highs. Journal of Commerce. ND. LN. 2. Ivory Coast unrest fuels prices of cocoa futures. The Globe and Mail. May 15 1990. LN. 3. Conscripts stage sit-in over pay. The Times. May 15 1990. LN.	Abidjan, Ivory Coast								1	1	0
Ivory Coast	More than 100 members of the Republican Guard left their barracks in Abidjan, fired into the air, took hostages in the presidential palace, and demanded higher wages and better conditions. The mutiny ended when President Houphouet-Boigny agreed to consider their demands.	437	1993-03-28	1993	IC3	1	1		1. Soldiers hold presidential palace in Ivory Coast. The Associated Press. March 30 1993. LN. 2. Soldiers in Ivory Coast give up siege of presidential palace. The Associated Press. March 31 1993. LN. 3. Guards mutiny. Press Association. March 30 1993. LN.	Treichville, Ivory Coast								1	1	0
Ivory Coast	Hundreds of soldiers in Abidjan shot into the air on their way to take over the national radio and televisions station and protest at the home of an army commander. Mutineers protested the non-payment of allowances from their involvement in the peacekeeping mission in CAR. The soldiers looted and robbed at shopping centers and stole cars on roadways. The mutiny escalated into a coup when soldiers…	437	1999-12-23	1999	IC4	1	1	Mutiny that escalated into a coup.	1. Ivory Coast; Shooting by Ivorian soldiers in Abidjan. Africa News. December 23 1999. LN. 2. Armed soldiers take to streets in Ivory Coast capital. Associated Press International. December 23 1999. LN. 3. Government soldiers take to streets in Ivory Coast capital. The Associated Press. December 23 1999. LN. 4. Leader of Ivory Coast rebellion has a checkered past with BC-Ivory Coast-Army rebelli…	Abidjan, Ivory Coast								1	1	0
Ivory Coast	More than 400 mutineers calling for a pay raise captured an ammunitions depot at Daloa barracks. An officer sent to negotiate was shot dead by the mutineers. The mutiny spread to two further bases in Abidjan, where soldiers there engaged in a standoff with superior officers.	437	2000-03-28	2000	IC16	1	1		1. One killed in Ivory Coast as soldiers mutiny. Agence France Presse. March 29 2000. LN. 2. One killed as Ivorian soldiers revolt over pay demands. Associated Press International. March 29 2000. LN. 3. Ivory Coast; Guei condemns blackmail by soldiers. Africa News. April 4 2000. LN.	Daloa, Ivory Coast	Abidjan, Ivory Coast							1	1	0
Ivory Coast	Sporadic gunfire broke out in Abidjan and Bouake with mutineers demanding pay increases, payment of a a six-million-CFA-franc bonus for involvement in the December coup, and payment for the UN mission DRC began firing into the air, stealing vehicles, and gathering in front of banks. A curfew was imposed and Guei promised that negotiations over bonuses would take place.	437	2000-07-04	2000	IC5	1	1		1. Ivory Coast; Army minister says situation under control in Abidjan. Africa News. July 4 2000. LN. 2. Ivory Coast junta imposes curfew as mutinous soldiers vent their anger. Agence France Presse. July 4 2000. LN. 3. URGENT -- Ivory Coast leader calls on mutinous soldiers to talk. Agence France Presse. July 4 2000. LN. 4. Ivory Coast junta and mutinous soldiers reach deal, calm returns. Agence F…	Abidjan, Ivory Coast	Bouake, Ivory Coast							1	1	0
Ivory Coast	More than 750 mutineers fired into the air in sustained, heavy gunfire in Abidjan, Bouake, and Korhogo. Loyal troops responded to the mutiny and former leader and retired general Robert Guei was killed. The mutineers were protesting their upcoming forced retirement from the armed forces and demanding to be reintegrated.	437	2002-09-19	2002	IC20	1	1	Mutiny that escalated into a coup.	1. Cote d'Ivoire: Coup or mutiny? Former military ruler Guei killed. Africa News. September 19 2002. LN. 2. At least 80 Icoast troops killed in mutiny: source. Agence France Presse. September 19 2002. LN.	Abidjan, Ivory Coast	Bouake, Ivory Coast	Korhogo, Ivory Coast						1	1	0
Ivory Coast	In the wake of popular protests demanding the withdrawal of peacekeepers, soldiers in Abidjan took over a television station and furthered the demand. The mutineers demanded they be allowed to resume the war and claimed support for the president.	437	2003-12-01	2003	IC7	1	1		1. Ivory coast president refuses to accept army chief's resignations. Agence France Presse. December 2 2003. LN. 2. Ivorian soldiers storm TV station, demand peacekeeper withdrawal. Deutsche Presse-Agentur. December 1 2003. LN.	Abidjan, Ivory Coast								1	1	0
Ivory Coast	Armed attacks were carried out on two military bases (Akouedo and Basa) reportedly by armed men and and soldiers. Reports that the attack was a mutiny cited grievances over pay and "military status" as the cause. Heavy shooting by the mutineers/attackers resulted in between 7 and 13 deaths.	437	2006-01-02	2006	IC8	0	1	The event is marked low confidence due to a lack of information regarding actors. It is unclear if the attackers were active soldiers; it is clear however that the attackers were assisted by military soldiers as at least 5 soldiers were arrested.	1. At least 13 dead in foiled Ivory Coast attack. Agence France Presse. January 2 2006. LN. 2. Ivory Coast military repel attack on major base. Agence France Presse. January 3 2006. LN. 3. Five Ivory Coast army soldiers arrested over attack on army base. Agence France Presse. January 4 2006. LN. 4. Gunmen hit Ivory Coast military barracks. Associated Press Online. January 2 2006. LN. 5. Ivory Coa…	Abidjan, Ivory Coast								0	1	1
Ivory Coast	Soldiers in Vavoa and Seguela mutinied, attacking army headquarters in the west of the country. The soldiers were protesting the nonpayment of wages and demobilization allowances.	437	2008-06-28	2008	IC9	1	1		1. Icoast peace process in jeopardy: senior official. Agence France Presse. June 30 2008. LN. 2. Ivory Coast: talks with rebel soldiers break up. Agence France Presse. July 2 2008. LN. 3. Former Icoast rebels in short-lived mutiny. Agence France Presse. June 28 2008. LN. 4. Rebel mutiny ends in Ivory Coast, demands not met. Voice of America News. June 30 2008. LN. 5. Ivory Coast PM rules out forc…	Vavoua, Ivory Coast	Seguela, Ivory Coast							1	1	0
Ivory Coast	Mutineers in Bouaké attacked the presidential palace, protested in the streets, blocked the southern road leading to Abidjan, and briefly seized the FN command center. The mutineers were demanding payment of 5 million CFA per soldier as part of a demobilization agreement.	437	2008-08-18	2008	IC17	0	1	The event is marked as low confidence due to a lack of information regarding the actors involved. Reports contain references to demobilized soldiers.	1. Cote d'Ivoire: Soro advised to deal with New Forces protesting unkept promises. BBC Monitoring Africa. August 21 2008. LN. 2. Cote d'Ivoire: Angry ex-combatants dare Soro to come to Bouake to meet them. BBC Monitoring Africa. August 23 2008. LN. 3. Cote d'Ivoire: Article urges rapid disarming reintegration to end troop unrest. BBC Monitoring Africa. August 23 2008. LN. 4. Cote d'Ivoire: New Fo…	Bouake, Ivory Coast								0	1	1	Second instance, Dwyer found 1 in Ivory Coast 2008, we found 3
Ivory Coast	Soldiers in Daoukro, Yamoussoukro, and Daloa blocked roads and fired into the air, protesting the government's failure to pay promised bonuses.	437	2008-09-26	2008	IC10	1	1		1. Ivorian soldiers protest over bonuses. Agence France Presse. September 26 2008. LN. 2. Ivory Coast pm tells protesters to 'keep calm.' Agence France Presse. September 29 2009. LN.	Daoukro, Ivory Coast	Yamoussoukro, Ivory Coast	Daloa, Ivory Coast						0	1	1	Third instance, Dwyer found 1 in Ivory Coast 2008, we found 3
Ivory Coast	Soldiers in Bouaké mutinied, taking over a television station, erecting roadblocks, and threatening to attack banks if demands regarding the payment of bonuses from a 2007 agreement were not met. The mutiny spread to cities including Abidjan, Korhogo, Bondoukou, Daloa, Bouaké, and Abengourou.	437	2014-11-18	2014	IC11	1	1		1. I.Coast soldiers storm TV, protest over pay dispute. Agence France Presse. November 18 2014. LN. 2. I.Coast troops ordered back to barracks amid pay protest. Agence France Presse. November 18 2014. LN. 3. Ivory Coast troops protest over benefits. Al Jazeera. November 18 2014. LN. 4. Ivory Coast tells soldiers to return to barracks. Associated Press International. November 14 2014. LN. 5. Ivory…	Abidjan, Ivory Coast	Korhogo, Ivory Coast	Bondoukou, Ivory Coast	Daloa, Ivory Coast	Bouake, Ivory Coast	Abengourou, Ivory Coast			1	1	0
Ivory Coast	Soldiers in Bouaké mutinied, breaking into the armory, shutting down roads, and seizing police stations. The soldiers demanded bonuses, promotions, salary increases, and better living conditions. The mutiny spread to at least eight cities including Bouaké, Korhogo, Daloa, Abidjan, Man, Touleplue, Daoukro, and Odienne.	437	2017-01-06	2017	IC13	1	1		1. Soldiers launch mutinies in three Ivory Coast cities. Al Jazeera Africa. January 6 2017. LN. 2. Ivory Coast defence minister, others freed by mutinying soldiers. Channel News Asia. January 7 2017. LN. 3. Soldiers mutiny in 3 Ivory Coast cities over pay. Canadian Press. January 6 2017. LN. 4. Ivory Coast President says deal reached to end army mutiny. Canadian Press. January 7 2017. LN. 5. Situ…	Bouake, Ivory Coast	Korhogo, Ivory Coast	Daloa, Ivory Coast	Abidjan, Ivory Coast	Man, Ivory Coast	Touleplue, Ivory Coast	Daoukro, Ivory Coast	Odienne, Ivory Coast	0	1	0
Ivory Coast	Members of the Forces Spéciales mutinied, shooting into the air in the barracks and in the towns of Adiaké and Tengrela. Soldiers protested their exclusion from the negotiated agreement that ended the January 2017 mutiny. They claimed to only have been paid a fraction of their monthly salary and demanded inclusion in the January agreement.	437	2017-02-07	2017	IC12	1	1		1. Elite I.Coast troops fire protest shots at two bases. Agence France Presse. February 7 2017. LN. 2. Ivory Coast govt in bid to end elite troops' mutiny. Agence France Presse. February 8 2017. LN. 3. I.Coast govt pursues bid to end mutiny by elite troops. Agence France Presse. February 9 2017. LN. 4. Ivory Coast special forces mutiny in town of Adiake - sources. Channel News Asia. February 7 20…	Adiake, Ivory Coast	Tengrela, Ivory Coast							0	1	0
Ivory Coast	Soldiers involved in the January 2017 mutiny mutinied again in at least seven cities including Bouake, Abidjan, Odienne, Korhogo, Daloa, Man, and Bondoukou. The soldiers fired into the air and blocked roads, claiming that the mutineer spokesman who apologized to the president and absolved the state of future payments to the mutineers was mistaken. The soldiers demanded the government follow throu…	437	2017-05-12	2017	IC14	1	1		1. Six wounded in Ivory Coast anti-mutiny protest. Al Jazeera Africa. May 14 2017. LN. 2. Ivory Coast soldiers stage fresh revolt over pay. Al Jazeera Africa. May 12 2017. LN. 3. Gunfire in Abidjan as Ivory Coast soldiers protest over pay. Deutsche Presse-Agentur. May 12 2017. LN. 4. Ivory Coast soldiers mutiny, blockading a city. The New York Times. May 13 2017. LN. 5. Gunfire in I.Coast barrack…	Bouake, Ivory Coast	Abidjan, Ivory Coast	Odienne, Ivory Coast	Korhogo, Ivory Coast	Daloa, Ivory Coast	Man, Ivory Coast	Bondoukou, Ivory Coast		0	1	0
Ivory Coast	Soldiers mutinied in Bouake, protesting the non-payment of bonuses and treatment by supior troops, setting a military base on fire. The mutiny spread to Abidjan.	437	2017-12-28	2017	IC18	1	1		1. Military mutiny ends peacefully in Ivory Coast. CNN. January 2 2018. Google. 2. Disgruntled soldiers stage another mutiny in Ivory Coast. January 14 2018. Global Research. Google. Available from: https://www.globalresearch.ca/disgruntled-soldiers-stage-another-mutiny-in-ivory-coast/5626013	Bouake, Ivory Coast	Abidjan, Ivory Coast							0	1	0
Kenya	Soldiers of the Kenya Rifles mutinied in Nairobi and Nakuru, protesting the wages African soldiers were being paid. The soldiers seized an armory and engaged in "sit-down strikes."	501	1964-01-24	1964	KE1	1	1		1. Parsons, Timothy.2007. "The Lanet Incident, 2-25 1964: Military Unrest and National Amnesia in Kenya." International Journal of African Historical Studies 40(1): 51-70. 2. British aid Kenya as her soldiers mutiny over pay. The New York Times. January 24 1965. PROQ. 3. British put down African mutinies in three nations. January 26 1964. Google. Mazrui, Ali and Donald Rothchild. 1967. "The Soldi…	Nairobi, Kenya	Nakuru, Kenya							0	0	0
Lesotho	Soldiers mutinied in Maseru, demanding 100% pay increases and anger over internal rivalries. The mutiny was put down by intervention from the British Commonwealth.	570	1994-01-23	1994	LE5	1	1		1. A mutiny in little Lesotho is rattling big South Africa. The New York Times. January 24 1994. Google. 2. News Summary. January 25 1994. New York Times. Google. Available from: https://www.nytimes.com/1994/01/25/us/news-summary-979171.html 3. AM-Lesotho ; Deputy prime minister killed by rebel soldiers. The Canadian Press. April 14 1994. LN. 4.Cabinet ministers detained, shooting heard in capita…	Maseru, Lesotho								0	0	0
Lesotho	Soldiers angry over a pay dispute mutinied in the capital (Makonyane barracks), killing the deputy pm and taking other government officials hostage. The mutiny is believed to stem from unresolved demands made in the January 1994 mutiny.	570	1994-04-14	1994	LE1	1	1		1. Lesotho soldiers releaase four ministers. Xinhua News Agency. April 14 1994. LN. 2. Cabinet ministers detained, shooting heard in capital. The Associated Press. April 14 1994. LN. 3. AM-Lesotho ; Deputy prime minister killed by rebel soldiers. The Canadian Press. April 14 1994. LN. 4. Lesotho-Politics: Deputy prime minister shot dead. IPS-Inter Press Service. April 14 1994. LN. 5. Lesotho army…	Maseru, Lesotho								0	0	0
Lesotho	Junior officers in Maseru mutinied, taking the national security director and a government secretary hostage. The soldiers demanded the resignation of the two senior officers and indemnity from prosecution for their actions. The officials were released after 18 days.	570	1995-03-04	1995	LE2	1	1		1. Junior Lesotho army officers release hostages. Deutsche Presse-Agentur. March 22 1995. LN. 2. Lesotho; Government efforts to free director of security services prove unsuccessful. BBC Summary of World Broadcasts. March 11 1995. LN. 3. Lesotho's security chief still taken hostage. Xinhua News Agency. March 8 1995. LN. 4. Junior officers hold security chief hostage. Associated Press Worldstream.…	Quthing, Lesotho	Maseru, Lesotho							0	0	0
Lesotho	Junior officers in Maseru mutinied, placing the commander of the army, the prime minister, and several other army officials under arrest and broadcasting a message on the radio. The soldiers forced the resignation of high-ranking army officials. The mutiny occurred in the aftermath of a report issued by the Langa Commission, detailing electoral fraud. South Africa and Botswana intervened to put d…	570	1998-09-11	1998	LE4	1	1		1. How did Pretoria err? Lesotho counts the ways. The New York Times. September 27 1998. Google. 2. Military unrest in Lesotho. Associated Press Online. September 11 1998. LN. 3. Lesotho army officers flee the country: police. Agence France Presse. September 17 1998. LN. 4. Lesotho army commander resigns. Xinhua News Agency. September 11 1998. LN. 5. Lesotho calm amid conflicting reports of coup.…	Maseru, Lesotho								0	0	0
Liberia	Soldiers in Monrovia mutinied, protesting the squandering of supplies that they had communally gathered, by officers. The mutiny was put down when the president threatened to send troops in to crush the revolt.	450	1963-04-03	1963	LB1	1	1		1. Mutiny in Liberia quelled. New York Times. April 5 1963. PROQ.	Monrovia, Liberia								1	1	0
Liberia	Between 8000 and 9000 troops mutinied in Monrovia, erecting roadblocks, stoning cars that attempted to pass, and looting. The mutineers were demanding 3 months backpay and promised to continue until they were paid.	450	2004-12-21	2004	LB2	1	1		1. Liberia; Soldiers protest for pay, loot parts of the capital. Africa News. December 22 2004. LN. 2. Thousands of soldiers demonstrate in Liberia to demand back salaries. Associated Press International. December 21 2004. LN.	Monrovia, Liberia								0	1	1
Liberia	Officers at the Edward Beyan Kessely Barracks in Harbel mutinied, protesting the lack medical insurance and continued education they were promised prior to recruitment, salary structures, and the jailing of colleauges. 16 soldiers were dismissed from the army as a result.	450	2008-09-22	2008	LB3	0	1	The event is marked as low confidence due to a lack of information concerning the actors. The reports note that 16 soldiers refused to follow orders and were then discharged and this is when they began protesting. All the soldiers were privates though it is unclear if protests began after the soldiers were no longer active duty.	1. Liberia; Several new soldiers protest. Africa News. September 25 2008. LN. 2. Liberia; Dismissed AFL soldiers seek LCC's intervention. Africa News. September 27 2008. LN. 3. Liberia; defense ministry rejects LCC appeal. Africa News. September 28 2008. LN. 4. Liberia dismisses 16 soldiers for indiscipline. BBC Monitoring Africa. September 26 2008. LN.	Harbel, Liberia								0	1	1
Liberia	Protesting soldiers and their wives erected a roadblock on the main road from the airport to Monrovia. The mutinying soldiers were demanding they be repaid the money removed from their salaries by the government in a "compulsory savings" plan. Later in the week, soldiers' widows joined the mutiny/protest and demanded death benefits.	450	2018-01-10	2018	LB5	1	1		1. Liberia: new govt to refund soldiers' US $1 million. AllAfrica.com. 19 January 2018. Google. 2. Liberia: Govt. to resistute soldiers' money. AllAfrica.com. 19 January 2018. Google. 3. Liberia: Defence minister admits to 'wastefully' spending AFL soldiers pension benefits. AllAfrica.com. 19 January 2018. Google. 4. Liberia: President Sirleaf meets wives of aggrieved soldiers - assures of resolv…	Monrovia, Liberia								0	1	0
Libya	Hundreds of soldiers stationed in Tobruk mutinied and up to 400 were killed or wounded in a government response.	620	1980-08-07	1980	LY1	1	1		1. Libya denies report of military revolt: Diplomats speak of 'disturbances' in the air force at Tobruk and say no one was killed. The New York Times. August 19 1980. PROQ. 2. Libya denies reports of mutiny by army unit. The Washington Post. August 19 1980. Google. Available from: https://www.washingtonpost.com/archive/politics/1980/08/19/libya-denies-reports-of-mutiny-by-army-unit/42a4e9af-b33b-…	Tobruk, Libya								0	0	0
Libya	Hundreds of armed, uniformed soldiers in Benghazi mutinied, protesting around the central bank to demand overdue wages and protest the takeover of their bases by militia groups. They also stated they did not wish to join the new national army	620	2012-01-05	2012	LY4	1	1		1. Soldiers protest over unpaid salaries. Business Monitor Online. January 6 2012. LN. 2. Libyan soldiers demand salaries, complain about militias. Defence Web. January 6 2012. LN. 3. Libyan revolt. The Middle East Reporter (MER). January 6 2012. LN. 4. Troop protest calls for militia clampdown. Morning Star. January 6 2012. LN. 5. Soldiers in Libya protest in effort to get back pay. The Washingt…	Benghazi, Libya								0	0	0
Madagascar	Soldiers in Antananarivo mutinied, blocking roads in the Soanierana district. The soldiers claimed they were no longer taking orders from the government and would not fire on civilians, in a reference to crackdowns on recent protests. 2 days into the mutiny, the Army chief of staff issued an ultimatum to the government stating they would take control if political leaders did not resolve the crisi…	580	2009-03-08	2009	MA3	1	1	Mutiny that escalated into a coup.	1. Mutiny in Madagascar military base: soldiers. Agence France Presse. March 8 2009. LN. 2. Mutiny in Madagascar military camp: soldiers. Agence France Presse. March 8 2009. LN. 3. Section of Malagasy army reportedly mutinies. BBC Monitoring Africa. March 8 2009. LN. 4. Head of Malagasy presidential guard denies rumours of mutiny. BBC Monitoring Africa. March 8 2009. LN. 5. Roundup: Madagascar tr…	Antananarivo, Madagascar								0	0	0
Madagascar	Troops mutinied near the main airport at Ivato military base for several hours. A negotiatior sent in to talk with the mutineers was killed. Reports speculate that the mutiny was an attempt spoil political negotiations (aimed at disrupting the meeting between Andry Rajoelina and Marc Ravalomanana).	580	2012-07-22	2012	MA4	1	1		1. Madagascar; troops mutiny ahead of political summit. Africa News. July 22 2012. LN. 2. New gunfire outside military base near Madagascar airport. Agence France Presse. July 22 2012. LN. 3. Madagascar troops mutiny near main airport: minister. Agence France Presse. July 22 2012. LN. 4. Madagascar military quells soldiers' mutiny. The Associated Press. July 22 2012. LN. 5. Soldiers mutiny at Mad…	Antananarivo, Madagascar								0	0	0
Mali	Soldiers began a mutiny in Bamako, firing in the air and taking over the radio and television station. They were protesting the conflict in the north and demanded proper weapons and equipment to fight the Tuaregs. Similar mutinies and rioting were reported in Kati and Gao. The mutiny escalated into a coup when soldiers stormed the presidential palace and deposed the president.	432	2012-03-21	2012	ML2	1	1	Mutiny that escalated into a coup.	1. Mali renegade soldiers say government dissolved. Voice of America News. March 22 2012. LN. 2. Mali; shots fired in Bamako during 'mutiny.' Africa News. March 21 2012. LN. 3. Fed-up with northern rebellion, Mali soldiers revolt. Agence France Presse. March 21 2012. LN. 4. Soldiers announce coup in Mali weeks before vote. Daily News Egypt. March 22 2012. LN. 5. Hours after soldiers storm state T…	Bamako, Mali (Kati Barracks)	Gao, Mali	Kati, Mali						1	1	0
Mali	Soldiers in Douentza mutinied, refusing orders to relocate to Gao. The soldiers claimed that they were protesting the non-payment of wages and would not follow orders to move to Gao until they were paid.	432	2013-01-31	2013	ML1	1	1		1. Malian soldiers refuse to move north until salaries are paid. BBC Monitoring Africa. January 31 2013. LN.	Douentza, Mali								0	1	1
Mali	Soldiers, alleged to have been involved in the 2012 coup, mutinied at the Kati barracks, firing into the air and taking a close aide of Sanogo and an army colonel hostage. The soldiers were angry that they had not been promoted alongside colleagues also involved in ousting then-president Amadou Toumani Toure in March of the prior year.	432	2013-09-30	2013	ML5	1	1		1. Mali's mutinous soldiers expect president to resolve dispute with ex-junta. Xinhua General News Service. October 2 2013. LN. 2. Mali leader dissolves army reform panel. Voice of America News. October 3 2013. LN. 3. Arrests made after Mali military camp unrest. Associated Press Online. October 3 3013. LN. 4. Arrests made after Mali military camp unrest. Taiwan News. October 3 2013. LN. 5. Mali …	Kati, Mali								0	1	1
Mozambique	Mutinying troops in Manhica blocked the national highway and began shooting in the air, demanding three months of back pay. The following day the mutiny spread, with troops blocking roads in Palmeira and Alvor.	541	1992-07-29	1992	MZ1	1	1		1. Mozambican commandos in mutiny. The Xinhua General Overseas News Service. July 30 1992. LN. 2. Mozambique Troops block road in protest at non-payment of salaries. BBC Summary of world broadcasts. Jumy 31 1992. LN. 3. Four opposition members captured in failed coup attempt. The Associated Press. July 29 1992. LN.	Palmeira, Mozambique	Alvor, Mozambique	Manhica, Mozambique						0	0	0
Mozambique	Soldiers in Marracuene and Manhica mutinied, blocking the main road and demanding 9 months of back pay and better food.	541	1992-08-01	1992	MZ2	1	1		1. Mozambique Portuguese radio says Maputo garrison mutiny over pay and bad food. BBC Summary of World Broadcasts. August 3 1992. LN. 2. More Mozambican soldiers protest against non-payment of wages. The Xinhua General Overseas News. August 2 1992. LN. 3. Mozambican mutiny over, army chief says.	Marracuene, Mozambique	Manhica, Mozambique							0	0	0
Mozambique	Presidential guard troops mutinied, demanding back pay, possibly holding their commander hostage. The mutiny was put down and at least 600 mutineers were arrested.	541	1993-03-30	1993	MZ3	1	1		1. Mozambique: Unconfirmed reports of end to mutiny at Maputo barracks. BBC Summary of World Broadcasts. April 2 1993. LN. 2. Seven wounded as mutiny put down. The Associated Press. March 31 1993. LN.	Maputo, Mozambique								0	0	0
Mozambique	Mutinying soldiers blocked the Berio-Chimoio road and fired into the air, demanding payment of salary arrears.	541	1993-10-25	1993	MZ4	1	1		1. Mozambique - Zimbabwe road reopened after mutiny. Agence France Presse. October 26 1993. LN. 2. Soldiers block road to Zimbabwe until salaries are paid. BBC Summary of world broadcasts. October 27 1993. LN.	Beira Corridor at Dondo (Sofala province), Mozambique								0	0	0
Mozambique	Soldiers in Nampula threatened to mutiny if they did not receive their promised demobilization subsidies. When the government did not pay, they took over a railway station and would not allow supplies (food and water) into the town.	541	1993-12-27	1993	MZ5	0	1	The event is marked as low confidence due to a lack of information on the date of the mutiny.	1. Troops reportedly threaten mutiny if no bonus received. BBC Summary of world broadcasts. December 14 1993. LN. 2. Mutinous soldiers occupy railway station in Nampula Province. BBC Summary of world broadcasts. December 22 1993. LN. 3. Nacala-Nampula railway reopens after soldiers mutiny. BBC Summary of world broadcasts. December 24 1993. LN.	Nampula, Mozambique								0	0	0
Mozambique	Soldiers mutinied in Magude and Massinga, demanding their annual bonuses and improved logistics. The soldiers took over the highway and fired into the air.	541	1994-01-19	1994	MZ13	1	1		1. Government soldiers mutiny over annual bonus and logistics; bonuses paid. BBC Summary of world broadcasts. January 13 1994. LN. 2. Government soldiers in Magude mutiny to demand 1993 annual bonus. BBC Summary of world broadcasts. January 22 1994. LN.	Magude, Mozambique	Massinga, Mozambique							0	0	0
Mozambique	Troops in Mocuba mutinied, destroying houses and storming the local market, demanding immediate demobilization. The soldiers were attacked by civilians attempting to stop the rampage.	541	1994-06-06	1994	MZ6	0	1	This event is marked as low confidence due to the lack of information on the timing of events. In particular, it is unclear if the clashes between soldiers and civilians began after the mutiny or if the soldiers demanded demobilization after the clashes with civilans began.	1. Civilians kill two government mutineers. Agence France Presse. June 9 1994. LN. 2. Situation in Mocuba district calm after soldier reportedly killed in clashes. BBC Summary of world broadcasts. June 11 1994. LN.	Mocuba, Mozambique								0	0	0
Mozambique	Mutinying Renamo troops blocked the national highway and took travelers hostage. They demanded promised salaries and food.	541	1994-07-09	1994	MZ7	0	1	The event is marked as low confidence due to a lack of information regarding actors. It is unclear whether soldiers were part of interim government or not.	1. Renamo guerrillas in Dombe end mutiny, free hostages. BBC Summary of world broadcasts. July 15 1994. LN. 2. Renamo mutineers block main road, take travellers hostage. BBC Summary of world broadcasts. July 14 1994. LN.	Dombe, Mozambique								0	0	0
Mozambique	Soldiers in Namialo occupied the police station, seizing guns and firing at police and blocking the main toad to Nacala. The mutineers were demanding quicker demobilization. The mutiny spread to Maputo where they released all prisoners from the jail.	541	1994-07-18	1994	MZ8	1	1		1. Four killed as troops riot. Associated Press Worldstream. July 18 1994. LN. 2. Government troop mutinies spread to Gaza, Inhambane Provinces. BBC Summary of world broadcasts. July 22 1994. LN. 3. Mutiny occurs in northern Mozambique. Xinhua News Agency. July 19 1994. LN.	Namialo, Mozambique	Maputo, Mozambique							0	0	0
Mozambique	Soldiers mutinied in Maputo, seizing a tank and roaming the city, robbing civilians. The soldiers were demanding back pay, immediate demobilization, and a meeting with President Chissano.	541	1994-07-26	1994	MZ10	1	1		1. Mozambique-politics: government reaches truce with mutineers. IPS-Inter Press Service. July 29 2994. LN. 2. Mozambique-politics: soldiers mutiy over demobilization. IPS-Inter Press Service. July 27 1994. LN. 3. Tank brigade ends mutiny. Deutsche Presse-Agentur. July 29 1994. LN. 4. Mozambican troops loot market in mutiny over demobilization. Deutsche Presse-Agentur. July 27 1994. LN. 5. Troops…	Maputo, Mozambique								0	0	0
Mozambique	Hundreds of soldiers mutinied in Quelimane, firing into the air and shooting at loyalist troops, taking the provincial military commander and an army captain hostage, and threatening to shell the city.The mutiny spread to Milange, Nicolada, and Issidua where the soldiers demanded immediate demobilization and demobilization benefits, citing lost patience with the government and UNOMOZ.	541	1994-08-02	1994	MZ11	1	1		1. Naparamas end mutiny after meeting with government official. BBC Summary of world broadcasts. August 6 1994. LN. 2. Zambezia troop mutiny continues; nearly 9000 Naparamas irregulars mutiny. BBC Summary of world broadcasts. August 5 1994. LN. 3. Mutinying troops in Quelimane threaten to shell city, seize airport BBC Summary of world broadcasts. August 4 1994. LN. 4. Aid workers evacuated as sol…	Quelimane, Mozambique	Milange, Mozambique	Issidua, Mozambique	Nicoadala, Mozambique					0	0	0
Mozambique	Soldiers of the 8th Infantry Brigade in Chokwa mutinied, jailing their officers, taking hostages, and seizing a goods train. They shot into the air, protesting poor conditions and low salaries and demanded immediate demobilization.	541	1995-02-23	1995	MZ12	1	1		1. Mutiny ruffles Mozambique's fragile peace. The Guardian. March 3 1995. LN. 2. Disgruntled Mozambican soldiers' mutiny causing panic, says radio. Deutsche Presse-Agentur. February 24 1995. LN. 3. Troops on rampage over pay. Agence France Presse. February 24 1995. LN.	Chokwe, Mozambique								0	0	0
Niger	Troops in Niamey mutinied, opposing the reassignment of their commander.	436	1963-12-01	1963	NI1	1	1		1. The Military Intervenes: Case studies in political development. 1968. Ed. Henry Bienen. Russel Sage Foundation. 2. Mali reports rebellion among frontier nomads. The New York Times. December 8 1963. PROQ. 3. Rouvez, Alain. 1994. Disconsolate Empires: French, British and Belgian Military involvement in Post-Colonial Sub-Saharan Africa. Lanham: University Press of America.	Niamey, Niger								1	1	0
Niger	Soldiers in Niamey mutinied, taking over radio and television stations, taking hostages, and making salary demands. After stating that the mutiny was over and that the government would meet their demands, they again retook control of state media. The mutineers shut down the airport and drove around the city firing into the air.	436	1992-02-28	1992	NI4	1	1		1. Soldiers mutiny in Niger. The Associated Press. February 28 1992. LN. 2. Niger army denies coup attempt - Soldiers told to return to barracks after tense day in capital. The Globe and Mail March 2 1992. LN. 3. Niger strikers in protest at mutiny. The independent. March 3 1992. LN. 4. Niger troops rebel over arrears in pay. The Toronto Star. February 29 1992. LN. 5. Mutiny in Niger. The Washing…	Niamey, Niger								1	1	0
Niger	Mutineers took control of Zinder and the airport, demanding three months of back pay. Later in the day soldiers in Tahoua and Agadez threatened to undertake a similar mutiny if demands were not met within 24 hours. When demands were not met soldiers in Tahou, Agadez, and Maradi all joined the mutiny	436	1993-07-10	1993	NI5	1	1		1. Soldiers mutiny in Niger in protest over wages. Agence France Presse. July 10 1993. LN. 2. Call for mutiny spreads among military in Niger. Agence France Presse. July 11 1993. LN. 3. Army mutiny threat spreads. Agence France Presse. July 12 1993. LN. 4. President orders mutinous troops to get back into line. Agence France Presse. July 13 1993. LN. 5. Rebelling soldiers in Niger take 11 hostage…	Zinder, Niger	Tahoua, Niger	Agadez, Niger	Maradi, Niger					1	1	0
Niger	Soldiers in Agadez seized the mayor and army officers while protesting attacks by Tuareg rebels. The soldiers were demanding local officials and all ethnic Tuaregs be removed from the region.	436	1997-06-02	1997	NI6	1	1		1. URGENT army mutiny in Niger. Agence France Presse. June 2 1997. LN. 2. Army mutiny ends in northeast Niger, officials released. Agence France Presse. June 3 1997. LN.	Agadez, Niger								0	1	1
Niger	Soldiers began a mutiny in Diffa, protesting living and working conditions, and taking the deputy commander and senior local officials hostage. The mutiny spread to other locations (N'Gourti, Bosso, N'Guima, and Arlit) where soldiers demanded back pay and other allowances. Soldiers in Zinder seized a radio station and broadcast demands. Troops in Agadez mutinied in solidarity.	436	1998-02-21	1998	NI7	1	1		1. Mutinous soldiers hold officers, civilians hostage in Niger. Agence France Presse. February 23 1998. LN. 2. Army mutiny spreads in Niger, new hostages taken. Agence France Presse. February 26 1998. LN. 3. Niger faces second army rebellion in one week. Associated Press International. February 25 1998. LN. 4. Government employees walk off job in Niger. Associated Press International. February 24…	Diffa, Niger	N'Gourti, Niger	Bosso, Niger	N'Guima, Niger	Agadez, Niger	Zinder, Niger	Arlit, Niger		1	1	0
Niger	Troops took the deputy commander of the Republican Guard hostage in Niamey, firing into the air and demanding back pay.	436	1998-05-30	1998	NI9	1	1		1. Niger army moves in against rebellious paramilitaries. Agence France Presse. May 31 1998. LN. 2. Calm in Niger after rebellious paramilitaries overpowered. Agence France Presse. May 31 1998. LN. 3. Niger faces second army rebellion in one week. Associated Press International. February 25 1998. LN. 4. Mutiny ends in Niger. Xinhua News Agency. May 31 1998. LN.	Niamey, Niger								0	1	1	Decond instance, Dwyer found 1 in Niger 1998, we found 2
Niger	Soldiers mutinied in Maradi, protesting the non-payment of wages and meal allowances, and seized local administrators as hostages. The soldiers drove through the town firing into the air and commandeering vehicles.	436	1999-10-04	1999	NI10	1	1		1. Soldiers mutiny in eastern Niger town. Associated Press International. October 5 1999. LN. 2. Niger: Maradi now calm after "mutiny" by paratroops over pay. BBC Monitoring Africa. October 5 1999. LN. 3. Soldiers mutiny in southern town. World Markets Analysis. October 5 1999. LN. 4. Maradi now calm after "mutiny" by paratroops over pay. BBC Summary of World Broadcasts. October 6 1999. LN. 5. Ni…	Maradi, Niger								1	1	0
Niger	Soldiers in Arlit and Agadez mutinied, firing into the air, demanding back pay and the release of jailed colleagues.	436	1999-11-04	1999	NI11	1	1		1. Soldiers mutiny in northern Niger. Agence France Presse. November 9 1999. LN. 2. Niger army sends troops to quell mutinies, sacks 100 soldiers. Agence France Presse. November 15 1999. LN. 3. Niger: Army chief castigates troops for recent mutinies. BBC Monitoring Africa. November 16 1999. LN.	Madawela, Niger	Agadez, Niger							0	1	1	Second instance, Dwyer found 1 in Niger 1999, we found 2
Niger	A mutiny began in Diffa where soldiers took the local prefect, Diffa's mayor, a parliamentary deputy, and other security force officials hostage. Mutineers called for the dismissal of the army chief. Some reports indicate that soldiers did not want a dismissal but instead salary increases. The mutiny spread to both N'Guimi and N'Gourti	436	2002-07-30	2002	NI12	1	1		1. Rebel soldiers in eastern Niger reiterate call for talks, warn government against attacks. Associated Press International. August 3 2002. LN. 2. Mutinous soldiers in southeastern Niger await government troops. Agence France Presse. August 2 2002. LN. 3. Niger; Mutineers detain prefect, mayor and other dignitaries. Africa News. August 1 2002. LN. 4. Soldiers in Niger stage mutiny. Associated Pr…	Diffa, Niger	N'Guigmi, Niger	N'Gourti, Niger						1	1	0
Nigeria	Soldiers surrounded parliament and blocked the road to the airport, taking some ministers hostage. They appear to have also been in control of the airport at Kano. The soldiers may have been protesting the results of possibly rigged elections the prior October.	475	1966-01-15	1966	NG1	1	1		1. Army units back Nigeria regime: general says vow all loyalty to military government - pledges new charter. The New York Times. January 18 1966. PROQ. 2. Situation in doubt. The New York Times. January 16 1966. PROQ. 3. African armies move in when politicians fail. New York Times. January 2 1966. PROQ. 4. Nigerian army mutinies, premier kidnapped. Kabul Times. January 16 1966. vol. 4, no. 245. …	Lagos, Nigeria	Kano, Nigeria							1	1	0
Nigeria	Solders mutinied, blocking a road in Lagos. The motives for the mutiny are unclear but may have stemmed from anger over fear of demobilization.	475	1970-05-03	1970	NG13	1	1		1. Army in Nigeria has little to do. New York Times. May 3 1970.	Lagos, Nigeria								1	1	0
Nigeria	Over 100 soldiers, suffering from various injuries, mutinied at a hospital in Cairo, threatening mass suicide if they did not receive treatment. The soldiers at the ECOMOG Ward of the Nigerian Army Base Hospital, Yaba, threatened to burn down the hospital along with themselves.	475	2000-08-30	2000	NG2	1	1		1. Nigeria; Wounded Nigerian soldiers threaten mass suicide. Africa News. July 24 2000. 2. Nigerian peacekeepers appeal against mutiny conviction. Agence France Presse. April 3 2001. LN. 3. West Africa; Travails of the peacekeepers. Africa News. August 6 2000. LN. 4. Nigeria; Army sets up probe panel on ECOMOG soldiers. Africa News. September 14 2000. LN. 5. Nigeria sends wounded ECOMOG soldiers …	Yaba, Nigeria								1	1	0
Nigeria	Troops mutinied, blocking the Ondo-Akure road and starting fires, protesting the non-payment of wages from their service on a peacekeeping mission in Liberia. The mutiny was quelled once payment was promised and later at least 27 of the mutineers received life sentences.	475	2008-07-05	2008	NG4	1	1		1. Nigeria; GOC, officials in Akure to pay striking soldiers. Africa News. July 8 2008. LN. 2.Nigeria; Peacekeepers block roads in pay protest. Africa News. July 5 2008. LN. 3. Nigeria; 27 soldiers get life sentence over mutiny charge. Africa News. April 28 2009. LN. 4. Nigeria; GOC, officials in Akure to pay striking soldiers. Africa News. July 8 2008. LN. 5. Nigeria; Akure Rampage - Soldiers' b…	Akure, Nigeria								1	1	0
Nigeria	Soldiers began shooting in their barracks in Maiduguri, protesting the deaths of 12 of their fellow soldiers at the hands of Boko Haram. The mutiny escalated when some shot at the vehicle of General Officer Commanding (GOC) 7 Division of the Nigerian Army. Soldiers were reportedly angry about decisions made by commanding officers that they believe led to the ambush by Boko Haram.	475	2014-05-14	2014	NG10	1	1		1. Nigeria; mutiny in Borno as angry soldiers shoot seventh div goc. Africa News. May 14 2014. LN. 2. Nigeria; Boko Haram - Mutiny as Nigerian soldiers shoot at commanding officer's vehicle. Africa News. May 14 2014. LN. 3. Nigeria; mutiny in Borno as angry soldiers shoot seventh DIV GOC. Africa News. May 14 2014. LN. 4. Mutiny in Borno as angry soldiers shoot seventh DIV GOC. Daily Trust (Abuja)…	Maiduguri, Nigeria								1	1	0
Nigeria	Soldiers deserted their post in Kadarko village in Nasarwa state in protest against the non-payment of wages. The soldiers had reportedly not been paid for at least 9 months.	475	2018-04-11	2018	NG15	1	1		1. I deserted because I was oweed nine-month salaary - Nigerian soldier. Ionigeria (Lagos, Nigeria). April 23 2018. LN. 2. Nigeria: Soldiers desert troubled Nasarawa state community over alleged pay. AllAfrica.com. April 11 2018. Google. 3. Suspect: I deserted army for fear of Boko Haram. The Nation (Nigeria). April 10 2018. LN. 4. Soldiers desert troubled village in Lafia over non payment of all…	Kardoko Town, Nigeria								0	1	0
Nigeria	Soldiers took over Maiduguri airport, shooting in the air and protesting against their extended deployment and redeployment to Marte, a locality in Borno state. Calm was restored within a few hours and the government said the soldiers would face court martial.	475	2018-08-12	2018	NG14	1	1		1. Africa Research Bulletin. August 2018. 55(8): 21959-94. 2. Nigeria: Maiduguri airport mutiny - Army captain, 70 others detained for trial. AllAfrica.com. September 3 2018. Google. 3. Nigeria: Army explains shootings by troops at Maiduguri airport. AllAfrica.com. August 14 2018. Google. 4. Nigeria: Maiduguri Airport - army explains rowdy behavior of soldiers. AllAfrica.com. August 13 2018. Goog…	Maiduguri, Nigeria								0	1	0
Sao Tome and Principe	Angry soldiers mutinied, protesting the presidential guard and refused to receive honors from the president. Reports indicate that the soldiers were protesting rising prices.	403	2014-02-10	2014	ST1	1	1		1. President says discontent in Sao Tome army, plays down fears of uprising. 2. Feburary 2014 mutiny. GlobalSecurity.org Google. Available from: https://www.globalsecurity.org/military/world/africa/stp-mutiny-2014.htm	Sao Tome, Sao Tome e Principe								1	1	0
Senegal	Troops blocked the main road into Dakar and ministerial headquarters, angry over the failure to pay their allowances from a peacekeeping mission in CAR.	433	1999-04-08	1999	SE1	1	1		1. Senegal; Negotiations over Senegalese soldiers' pay postponed. Africa News. April 8 1999. LN. 2. Sengal: returning soldiers from UN Bangui mission demonstrate for allowances. BBC Monitoring Africa. April 9 1999. LN. 3. Returning soldiers fro UN Bangui mission demonstrate for allowances. BBC Summary of world broadcasts. April 10 1999. LN.	Dakar, Senegal								0	1	1
Seychelles	Soldiers took over a radio station and seized hostages In Victoria, stating they had no qualms with the president but wanted unnamed senior officers and defense chiefs dismissed. They threatened to kill the hostages and the mutiny was quickly put down by loyalist forces.	591	1982-08-17	1982	SY1	1	1		1. Mutiny in Seychelles. The Xinhua General Overseas News. August 17 1982. LN. 2. No headline in original. United Press International. August 17 1982. LN. 3. Accounts of soldiers' mutiny in the Seychelles. BBC Summary of World Broadcasts. August 18 1982. LN. 4. Seychelles rebellion is reported quelled. The New York Times. August 19 1982. LN. 5. No headline in original. United Press International.…	Victoria, Seychelles								0	0	0
Sierra Leone	Troops mutinied, surrounding the presidential palace in the capital, angry about poor medical care and the failure to make wage arrears payments. The mutiny escalated into a coup, removing Momoh.	451	1992-04-28	1992	SL1	1	1	Mutiny that escalated into a coup.	1. Sierra Leone Unrest. Agence France Presse. April 29 1992. LN. 2. Fighting between mutinous troops and loyalists in Sierra Leone. Agence France Presse. April 29 1992. LN. 3. Sierra Leone officers claim government ousted, president flees. The Associated Press. April 30 1992. LN. 4. Unpaid troops mutiny; loyal troops take control of state house. The Associated Press. April 29 1992. 5. Army said t…	Freetown, Sierra Leone								0	1	1
Somalia	Soldiers in units across the north of Somalia mutinied, protesting the execution of several senior army officers without trial or conviction. The mutiny encompassed troops from Borama, Gabileh, Deba, and Gor Iyo Alol.	520	1982-02-12	1982	SO2	1	1		1. The Horn of Africa; In brief; Somali dissidents claims on arrests of mutineers. BBC Summary of World Broadcasts. February 15 1982. LN. 2. Somali denial of mutiny reports. BBC Summary of World Broadcasts. February 16 1982. LN. 3. The situation in the north-west region of Somalia. BBC Summary of World Broadcasts. March 1 1982. LN. 4. Somalia crushes army mutiny. The Globe and Mail. February 12 1…	Borama, Somalia	Gabileh, Somalia	Deba Lef, Somalia	Gor Iyo Alol, Somalia					0	0	0
Somalia	Unpaid presidential guard soldiers stormed the presidential palace in Mogadishu demanding back pay. The mutiny escalated when the mutineers clashed with AU troops guarding the palace.	520	2010-06-19	2010	SO3	1	1		1. Somalia; Unpaid soldiers barricade presidential palace. Africa News. June 20 2010. LN. 2. AU peacekeepers "quell mutiny' in Somali presidential palace. BBC Monitoring Africa. June 22 2010. LN.	Mogadishu, Somalia								0	0	0
Somalia	Mutinying soldiers demanding back pay in Mogadishu blocked government officials, including cabinet ministers, parliamentarians, and transitional government military officers from entering the presidential palace. The mutiny escalated into clashes with loyalist forces.	520	2011-01-01	2011	SO4	1	1		1. Somalia; forces clash themselves in Mogadishu. Africa News. January 1 2011. LN. 2. Somalia; 19 killed in Mogadishu clashes, Govt forces mutiny. Africa News. January 1 2011. LN.	Mogadishu, Somalia								0	0	0
Somalia	Mutinying soldiers set up a checkpoint near the airport in Kismayo, protesting lack of pay and being denied port revenue.	520	2012-12-20	2012	SO5	1	1		1. Five killed in southern Somalia shootout as soldiers complain over lack of pay. BBC Monitoring Africa. December 22 2012. LN.	Kismayo, Somalia								0	0	0
Somalia	The mutiny began when soldiers blocked roads in Mogadishu, demanding 15 months of salary arrears. Soon after soldiers in both Garowe and Galkayo seized government buildings, including parliament, and demanded unpaid salaries.	520	2017-03-12	2017	SO7	1	1		1. Somalia; Puntland president blames officials of the mutiny. Africa News. March 11 2017. LN. 2. Somalia; Mutinous forces barricade Mogadishu's main streets. Africa News. March 12 2017. LN. 3. Somalia's Puntland troops stage another mutiny. BBC Monitoring Africa. March 9 2017. LN. 4. Somali soldiers block Mogadishu roads in protest over pay. BBC Monitoring Africa. March 13 2017. LN. 5. Somalia: …	Garowe, Somalia	Galkayo, Somalia	Mogadishu, Somalia						0	0	0
Somalia	Hundreds of soldiers blocked the main road near the Defense Ministry headquarters, mutinying to demand four months of arrears payments.	520	2017-05-24	2017	SO8	1	1		1. Somali soldiers stage short-lived mutiny over salary arrears. May 19 2017. Google. 2. Somalia: Soldier mutiny in Mogadishu May 18. GardaWorld News Alerts. May 19 2017. Google. Available from: https://www.garda.com/crisis24/news-alerts/61801/somalia-soldier-mutiny-in-mogadishu-may-18	Mogadishu, Somalia								0	0	0
South Africa	Mutinying soldiers marched 51 km from their base to the National Army Headquarters in Pretoria, protesting for salary demands.	560	1997-04-22	1997	SA3	1	1		1. S. African officials arrest 51 mutinying soldiers. Agence France Presse. April 22 1997. LN. 2.	Pretoria, South Africa								0	0	0
South Africa	Soldiers left their barracks in Lenasia, engaging in a peaceful protest against the lack of transport by walking the 20km to work. The soldiers were charged with mutiny due to the strict guidelines against marching.	560	2008-11-26	2008	SA4	1	1		1. 200 soldiers held over walk; charges of mutiny laid in protest over lack of transport at base. The Star (South Africa). November 27 2008. LN. 2. 200 soldiers held over walk. Security.co.za. November 28 2008. Google. Available from: https://www.security.co.za/news/10899	Lenasia, South Africa								0	0	0
South Africa	Troops angry about pay and conditions mutinied, protesting in the capital. This escalated into clashes with police forces.	560	2009-08-27	2009	SA5	1	1		1. South Africa army chief says protesting soldiers face discipline, grievances being addressed. The Canadian Press. September 4 2009. LN. 2. They would've been short for mutiny. IOL News. September 5 2009. Google. Available from: https://www.iol.co.za/news/south-africa/they-wouldve-been-shot-for-mutiny-457509	Pretoria, South Africa								0	0	0
South Sudan	Unpaid troops began firing into the air in a mutiny at a base near Juba. This escalated into clashes with loyalist forces.	626	2014-03-05	2014	SS1	1	1		1. Was it a failed coup or a failed assassination? South Sudan News Agency. February 26 2014. LN. 2. SPLM's Lino joins voices dismissing "coup attempt" in Juba. Sudan Tribune. February 26 2014. LN. 3. Juba rejects interim administration without Salva Kir. Sudan Tribune. February 25 2014. LN. 4. World Watch. Wall Street Journal Abstracts. March 6 2014. LN. 5. Africa Research Bulletin 50(12): 19943…	Juba, South Sudan								0	0	0
Sudan	Officers at Juba garrison staged a mutiny in protest against the handling of the separatist rebellion in the south. After receiving complaints from the officers, the army commander and staff traveled to the garrison where they were held hostage	625	1965-10-30	1965	SU4	1	1		1. Officers' mutiny in Sudan is bared: 60 in south protested way of handling rebellion. New York Times. December 12 1965. PROQ.	Juba, Sudan								0	0	0
Sudan	A company In Pibor began a mutiny when they refused orders from their commanding officer to move north. The mutiny spread to Bor and Vachala.	625	1983-05-15	1983	SU1	1	1		1. Sudan arrested 800 in mutiny. United Press International. June 5 1983. LN. 2. Sudan puts down army mutiny. The Washington Post. May 19 1983. LN. 3. Sudan reports failed army mutiny. The Associated Press. May 18 1983. LN. 4. Foreign news briefs. United Press International. May 20 1983. LN. 5. Rebellion in Sudan crushed. The Xinhua General Overseas News. May 23 1983. LN. 6. Nimeiri begins third …	Pibor, Sudan	Bor, Sudan	Vachala, Sudan						0	0	0
Tanzania	The army mutinied shortly after independence in the capital, occupying key government buildings, radio stations, and transport hubs, demanding the Africanization of the armed forces and pay increases.	510	1964-01-19	1964	TA1	1	1		1. Unrest spreads in new Africa: Recent events reflect problems facing the emerging nations. January 26 1964. New York Times. PROQ. 2. Remembering the 1964 Army mutiny [opinion]. The Citizen (Dar es Salam). October 28 2011. LN. 3. Tanzania military history, 1964 mutiny. GlobalSecurity.org. Google.	Dar es Salam, Tanzania								0	0	0
Tanzania	A small number of soldiers, reportedly involving officers from the Haya tribe, mutinied over "economic malaise."	510	1983-01-01	1983	TA2	0	1	Event is marked as low confidence due to lack of information on motives. Reports indicate this was a small scale mutiny due to "economic malaise."	1. Failed mutiny is reported in Tanzania. New York Times. January 23 1983. PROQ. 2. Tanzania coup plot uncovered. January 22 1983. Google. Available from: https://www.upi.com/Archives/1983/01/22/Tanzania-coup-plot-uncovered/8958412059600/	Unknown								0	0	0
Togo	Soldiers took over a radio station in a demonstration over wages. Similar demonstrations were reported at the army headquarters at Agoenyive, with soldiers firing into the air.	461	1991-06-28	1991	TO1	1	1		1. Togolese soldiers end protest. The Globe and Mail. June 29 1991. LN. 2. Soldiers disrupt radio broadcasts, shooting outside HQ. June 28 1991. Agence France Presse. LN.	Lome, Togo	Agoenyive, Togo							0	1	1
Togo	Soldiers in Lome surrounded the national assembly, demanding that the transitional government unfreeze money that was seized from the prior government.	461	1992-10-22	1992	TO3	1	1		1. Soldiers surround national assembly, force concessions. The Associated Press. October 22 1992. LN. 2. Soldiers release deputies taken hostage. The Associated Press. October 23 1992. LN. 3. Soldiers release deputies; explosion damages French aid office. The Associated Press. October 23 1992. LN. 4. WORLD IN BRIEF Legislators seized. The Globe and Mail. October 23 1992. LN. 5. Troops win cash ba…	Lome, Togo								0	1	1
Uganda	Soldiers mutinied in their barracks at Jinga, taking the interior minister hostage. Initial protests were related to pay raises.	500	1964-01-23	1964	UG2	1	1		1. Troops ask $42 a month. The New York Times. January 24 1964. PROQ. 2. Troops in Uganda mutiny over pay. The New York Times. January 23 1964. PROQ. 3. African Unrest. New York Times. January 26 1964. PROQ. 4. Britian keeps up patrol in Africa. The New York Times. January 27 1964. PROQ.	Jinja, Uganda								0	0	0
Uganda	Soldiers of the Tiger battalion overpowered their superior officers at the barracks in Mubende. The forces were reported to be members of the Lango and Acholi tribes.	500	1977-02-19	1977	UG1	1	1		1. Seized after a rally. The New York Times. February 17 1977. PROQ. 2. Amin acknowledges mutiny in his army. New York Times. February 24 1977. PROQ. 3. Uganda says 'dissidents in army' caused strife resulting in deaths. New York Times. February 23 1977. PROQ.	Mubende, Uganda								0	0	0
Zimbabwe	The army and air force mutinied, protesting the government's inability to provide food and/or increased salaries for the armed forces amidst hyperinflation.	552	2005-10-06	2005	ZI4	0	1	The event is marked as low confidence due to lack of information on actions of the mutineers. Reports reference some protests by the military, but it is unclear how they protested. One source notes that insubordination was contained to 2 barracks.	1. Zimbabwe; Increased unrest among country's military. Africa News. October 6 2005. LN. 2. Zimbabwe; Mnangagwa, Gumbo locked in power struggle. Africa News. October 6 2005. LN. 3. Zimbabwe; marching on its stomach. Africa News. October 7 2005. LN.	Harare, Zimbabwe								0	0	0
Zimbabwe	Soldiers mutinied in Harare, looting banks and shops for several days. They were angry over mismanagement of funds leading to food, money, and medicine shortages.	552	2008-11-27	2008	ZI7	1	1		1. Zimbabwe; soldiers riot over cash shortage. Africa News. November 28 2008. LN. 2. Zimbabwe; soldiers mount diamond terror campaign. Africa News. November 29 2008. LN. 3. Zimbabwe: Soldiers attack bank officials, civilians in capital. BBC Monitoring Africa. November 29 2008. LN. 4. Zim soldiers run amok as banks run out of cash. Argus Weekend. November 30 2008. LN. 5. Mugabe puts lock on troops…	Harare, Zimbabwe								0	0	0
Zimbabwe	Hungry soldiers mutinied in Masvingo, looting shops belonging to MDC legislator for Mkoba, demanding food after rations were cut.	552	2009-01-20	2009	ZI10	1	1		1. Zimbabwe: Fears of army mutiny over pay. AllAfrica.com. January 24 2009. Google. 2. Zimbabwe; soldiers are the new illegal diamond minder. Africa News. January 20 2009. LN. 3. Zimbabwe: Rival soldiers allegedly clash over diamonds; military police deployed. BBC Monitoring Africa. January 20 2009. LN. 4. Zimbabwe; troops fume over pay.	Masvingo, Zimbabwe								0	0	0

## Sheet: Dywer Comparison
Dwyer Case	Our Corresponding Case ID	Additional(1)	Additional(2)	Disagree/Not Found	Notes
DRC 1960	CK1	CK2			We record 2 mutinies in DRC 1960, Dwyer records 1
Ghana 1961	GH2
DRC 1961	CK3	CK4			We record 2 events in DRC 1961, Dwyer records 1
Togo 1963	-			Disagree on coding	Coup by demobilized soldiers
Liberia 1963	LB1
Niger 1963	NI1
Republic of Congo 1966	CB6
DRC 1966	CK6
Nigeria 1966	NG1
DRC 1967	CK9
Nigeria 1970	NG13
Benin 1972	BE1
Sierra Leone 1982	-			Unable to verify	Unable to confirm the mutiny that Dwyer reported
Burkina Faso 1983	BF9
Ivory Coast 1990	IC1				Dwyer has 2 mutinies listed in 1990, we have evidence of these events, but disagreed on coding it as two separate mutinies.
Ivory Coast 1990	-			Disagree on coding	Dwyer has 2 mutinies listed in 1990, we have evidence of these events, but disagreed on coding it as two separate mutinies.
Chad 1991	CH9
Gambia 1991	GM2
DRC 1991	CK34
DRC 1991	CK35
Benin 1992	BE3
Republic of Congo 1992	CB1
Gambia 1992	GM3
Niger 1992	NI4
CAR 1993	CR1
CAR 1993	CR9
DRC 1993	CK24	CK13			We record 2 events in DRC 1993, Dwyer records 1
Ivory Coast 1993	IC3
Niger 1993	NI5
CAR 1996	CR2
CAR 1996	CR3
CAR 1996	CR4
Republic of Congo 1996	CB5
Guinea 1996	GU1
Republic of Congo 1997	CB4
Republic of Congo 1997	CB3
Burkina Faso 1997	-			Unable to verify	Unable to confirm the mutiny that Dwyer reported
Niger 1998	NI7	NI9			We record 2 events in Niger 1998, Dwyer records 1
Ivory Coast 1999	IC4
Niger 1999	NI10	NI11			We record 2 events in Niger 1999, Dwyer records 1
Burkina Faso 1999	BF1
Ivory Coast 2000	IC16
Ivory Coast 2000	IC5
Nigeria 2000	NG2
Benin 2000	BE2
CAR 2001	CR7
Ivory Coast 2002	IC20
Niger 2002	NI12
Burkina Faso 2003	-			Disagree on coding	Coup plot/rumor
Ivory Coast 2003	IC7
Guinea Bissau 2004	GB8
Burkina Faso 2006	-			Disagree on coding	Infighting between police and soldiers when a soldier was killed by police after a fight
Burkina Faso 2007	BF3
Guinea 2007	GU2
Guinea 2007	-			Disagree on coding	Agree with coding as a mutiny but a Continuaton of GU2.
Guinea 2008	GU4
Ivory Coast 2008	IC9	IC17	IC10		We record 3 mutinies in Ivory Coast 2008, Dwyer records 1
Nigeria 2008	NG4
Guinea 2009	GU6	GU10			We record 2 mutinies in Guinea 2009, Dwyer records 1
Guinea 2010	GU7
Burkina Faso 2011	BF12	BF8			We record 4 mutinies in Burkina Faso 2011, Dwyer records 3
Burkina Faso 2011	BF5
Burkina Faso 2011	BF7
Guinea Bissau 2011	GB5
Mali 2012	ML2
Chad 2013	CH6
Sao Tome 2014	ST1
Nigeria 2014	NG10
Nigeria 2014	-			Disagree on coding	Coup by demobilized soldiers
Chad 2014	-			Disagree on coding	Civilian victimization
Ivory Coast 2014	IC11
Additional Cases Identified in Dwyer State-Years
CAR 1997	CR6
Chad 1968	CH7
Chad 1981	CH3
Chad 2004	CH4
DRC 1960	CK2	Second instance (Dwyer records 1)
DRC 1961	CK4	Second instance (Dwyer records 1)
DRC 1993	CK13	Second instance (Dwyer records 1)
DRC 1997	CK26
DRC 1997	CK25
DRC 1998	CK17
DRC 2009	CK19
DRC 2009	CK29
DRC 2012	CK20
Ghana 1980	GH1
Guinea 2009	GU10	Second instance, (Dwyer found 1)
Guinea Bissau 1993	GB1
Guinea Bissau 1998	GB7
Guinea Bissau 1999	GB2
Guinea Bissau 1999	GB3
Guinea Bissau 2008	GB4
Burkina Faso 2011	BF8	Fourth instance (Dwyer records 3)
Ivory Coast 2006	IC8
Ivory Coast 2008	IC17	Second instance (Dwyer records 1)
Ivory Coast 2008	IC10	Third instance (Dwyer records 1)
Liberia 2004	LB2
Liberia 2008	LB3
Mali 2013	ML1
Mali 2013	ML5
Niger 1997	NI6
Niger 1998	NI9	Second instance, (Dwyer found 1)
Niger 1999	NI11	Second instance, (Dwyer found 1)
Senegal 1999	SE1
Sierra Leone 1992	SL1
Togo 1991	TO1
Togo 1992	TO3
***We record 35 additional mutinies in the geographical and temporal period as Dwyer (2017), were unable to corroborate 2 of Dwyer's recorded mutinies, and disagree on the coding as a mutiny for 7 events
